# Supplementary material for: One-pot, microwave-assisted copper(i)-catalysed dithiocarbamation: facile introduction of dithiocarbamate on imidazopyridines
Source: Royal Society of Chemistry journal article supplement (doi:10.1039/d1gc03952k), 2021-12-24
Supplement: d1gc03952k1.pdf [file d1gc03952k1.pdf]

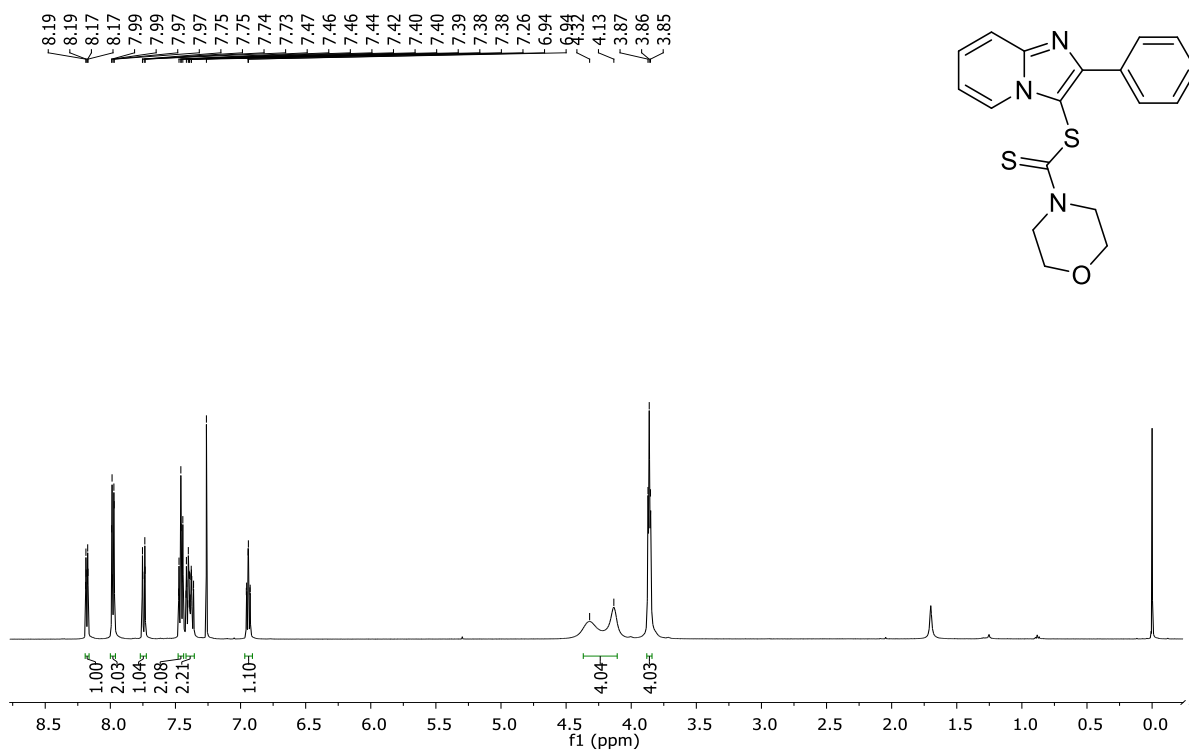

$^1\text{H NMR}$  (500 MHz,  $\text{DMSO}-d_6$ ) spectrum of compound **3aa**

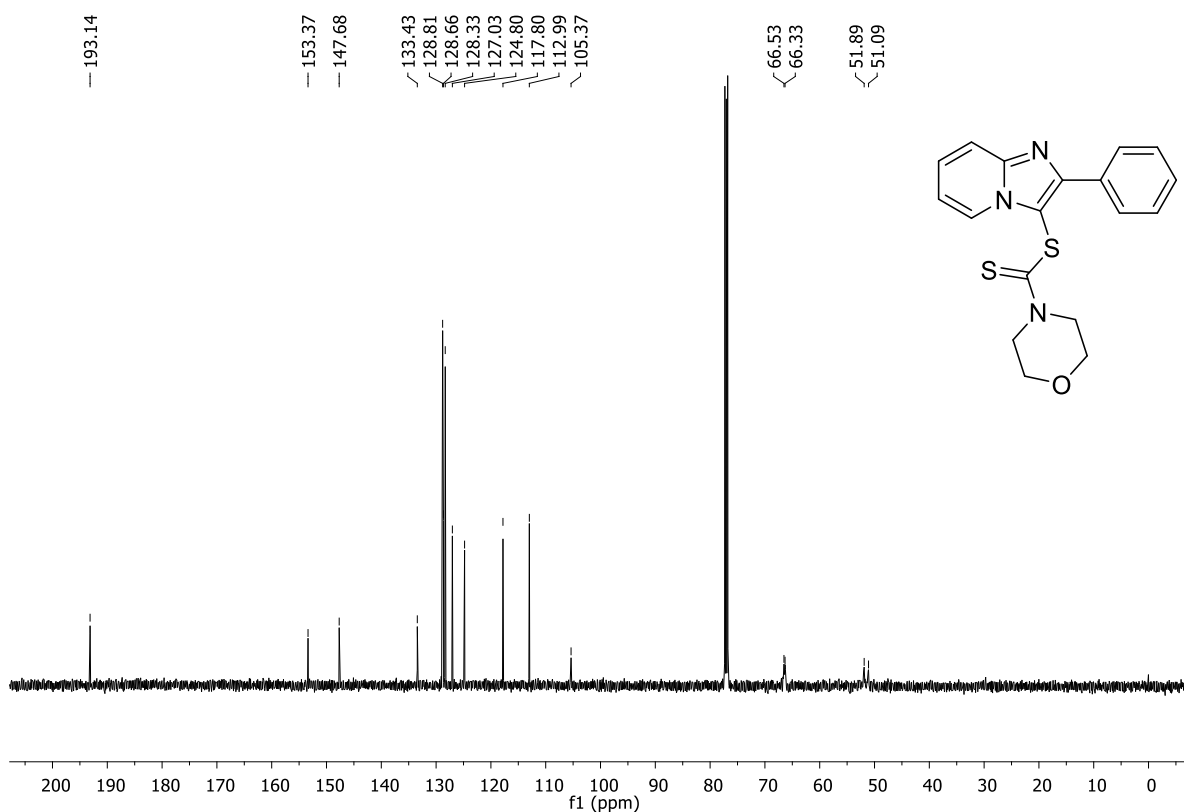

$^{13}\text{C NMR}$  (125 MHz,  $\text{DMSO}-d_6$ ) spectrum of compound **3aa**

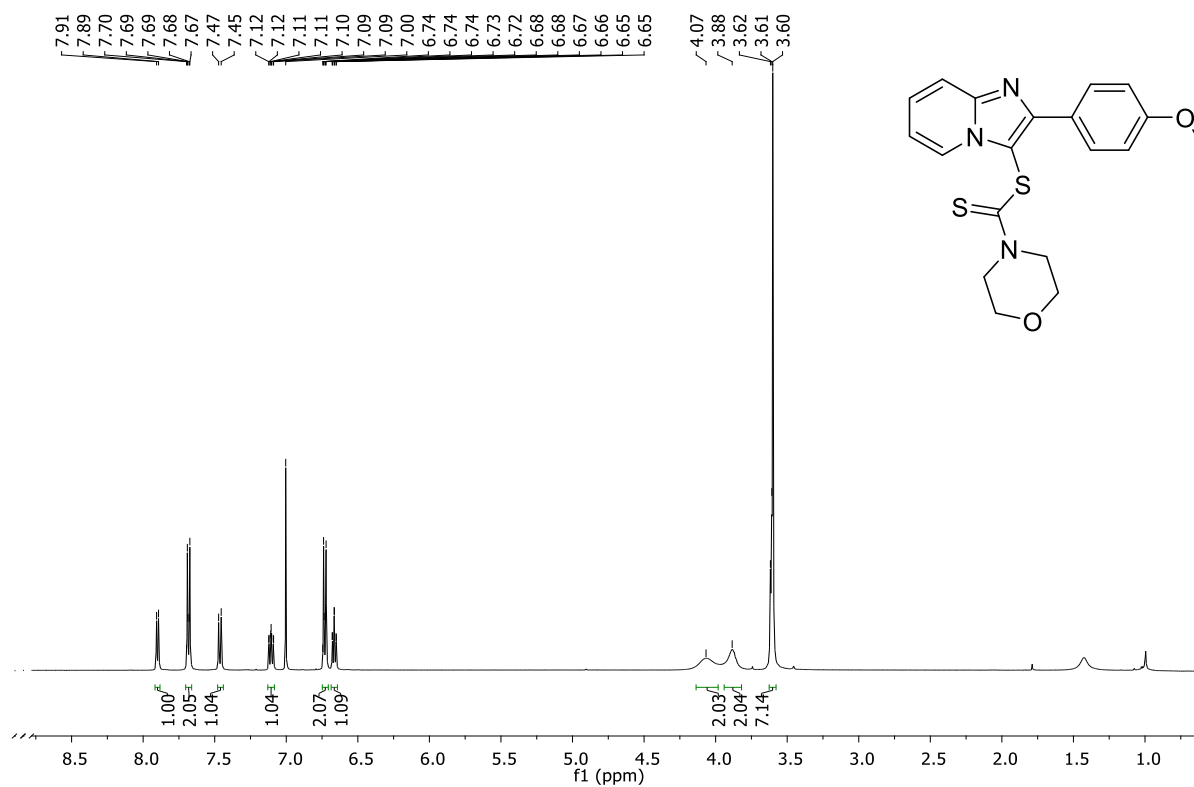

$^1\text{H}$  NMR (500 MHz,  $\text{DMSO}-d_6$ ) spectrum of compound **3ba**

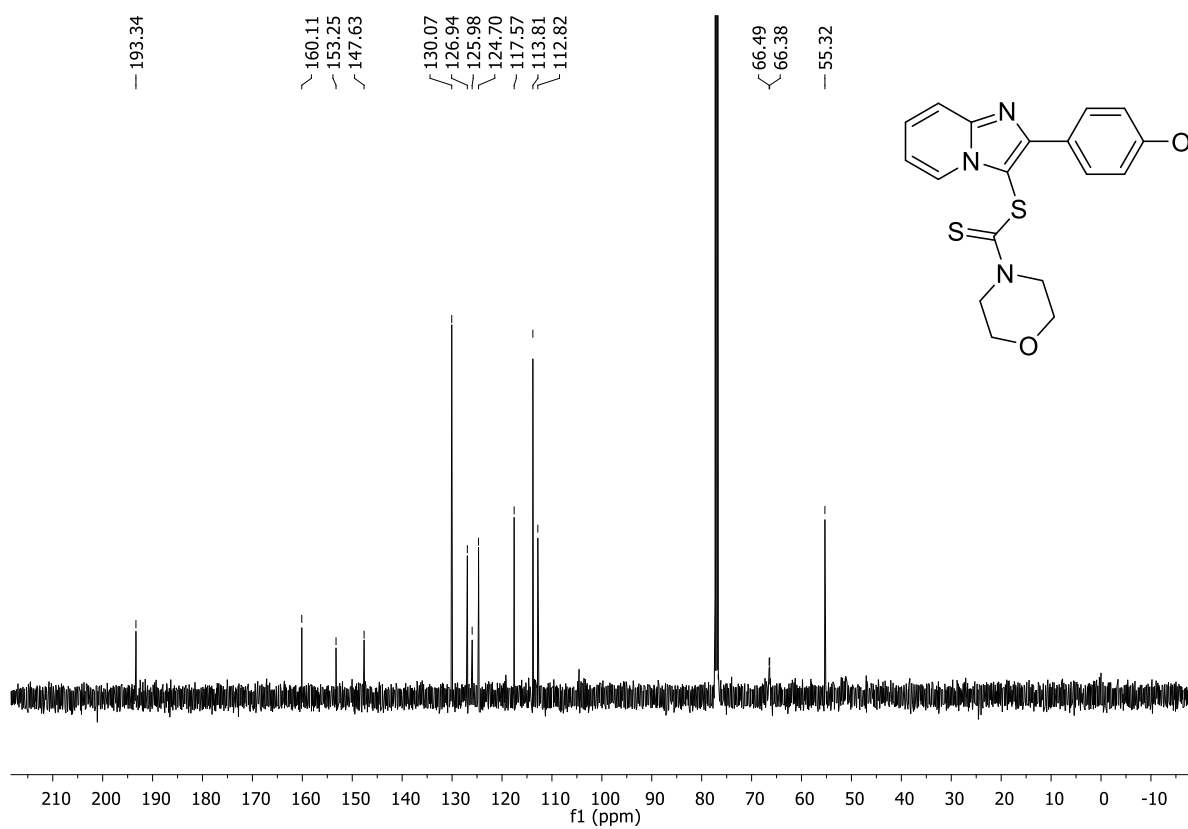

$^{13}\text{C}$  NMR (125 MHz,  $\text{DMSO}-d_6$ ) spectrum of compound **3ba**

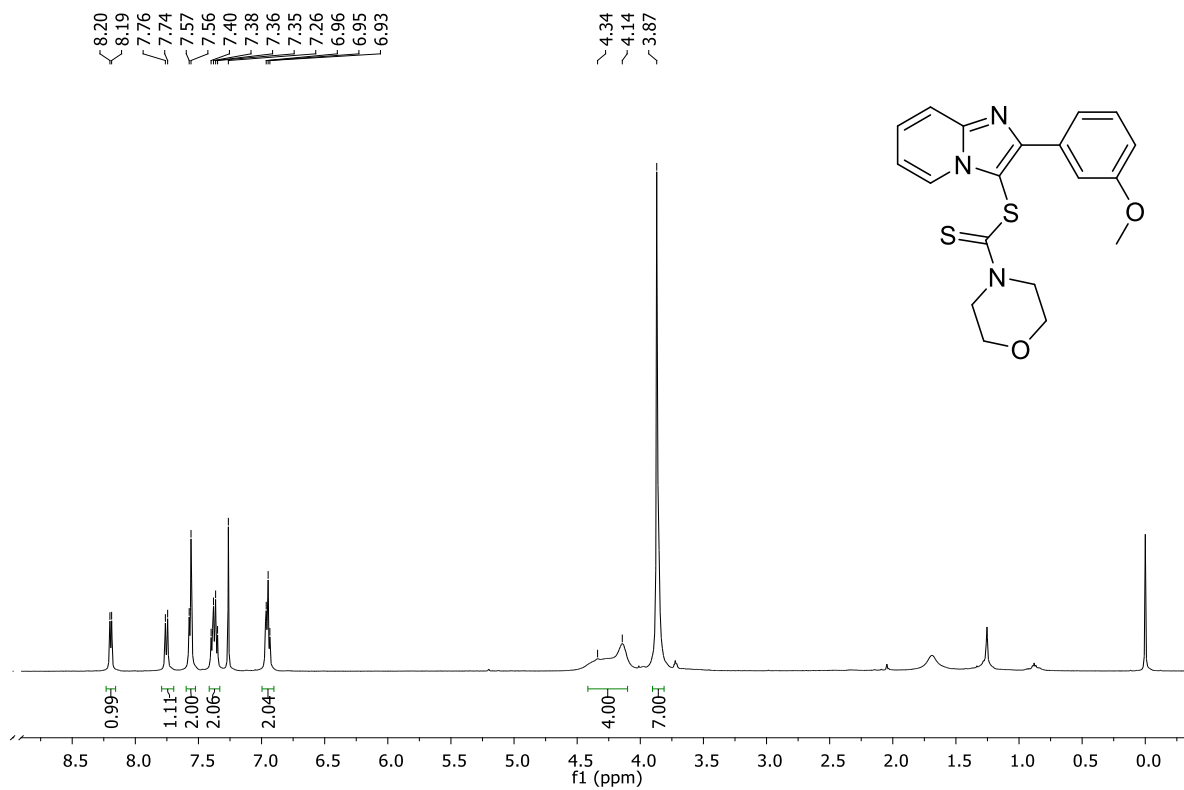

$^1\text{H NMR}$  (500 MHz,  $\text{DMSO-}d_6$ ) spectrum of compound **3ca**

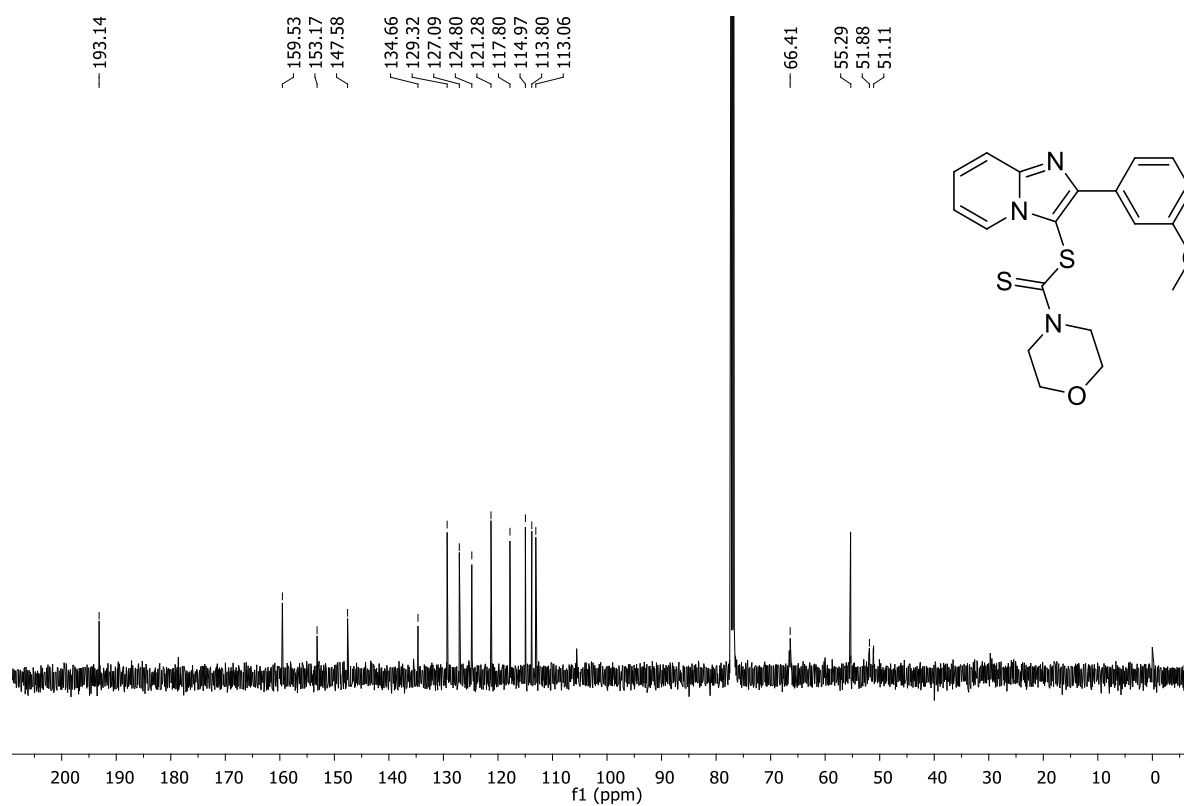

$^{13}\text{C NMR}$  (125 MHz,  $\text{DMSO-}d_6$ ) spectrum of compound **3ca**

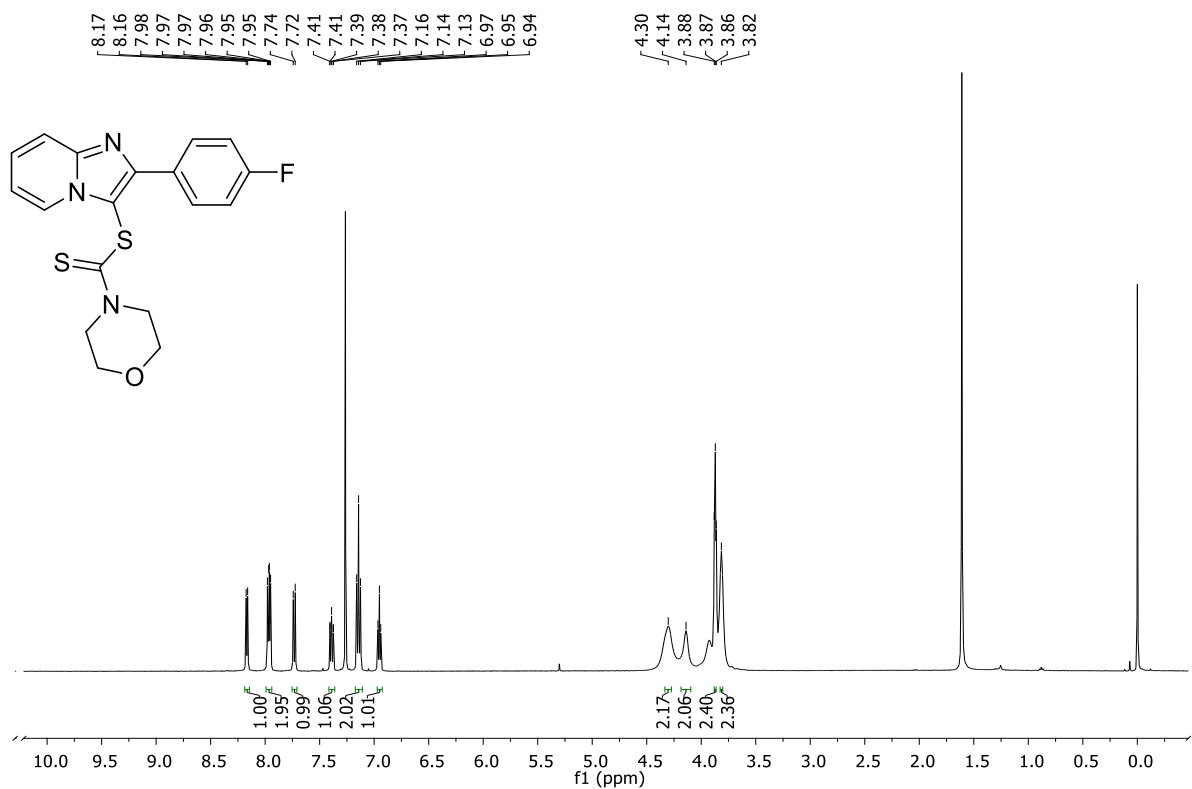

<sup>1</sup>H NMR (500 MHz, DMSO-*d*<sub>6</sub>) spectrum of compound **3da**

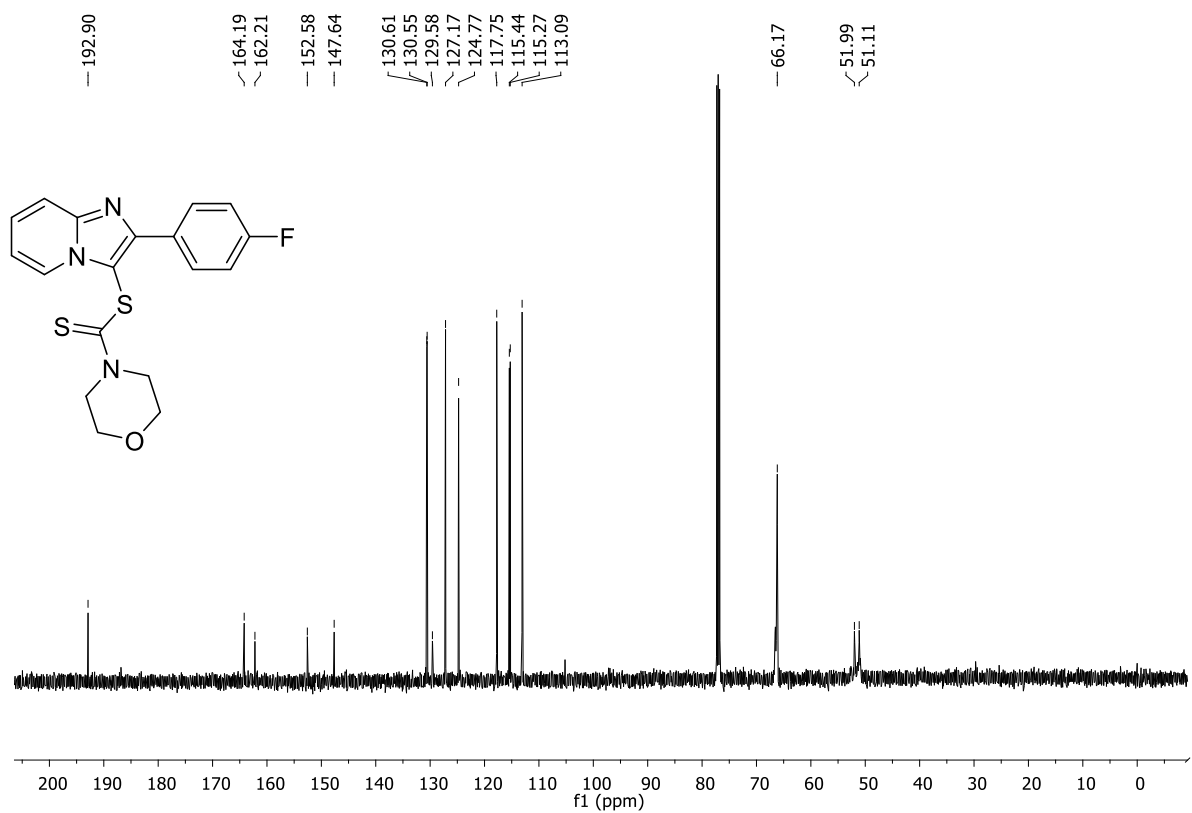

<sup>13</sup>C NMR (125 MHz, DMSO-*d*<sub>6</sub>) spectrum of compound **3da**

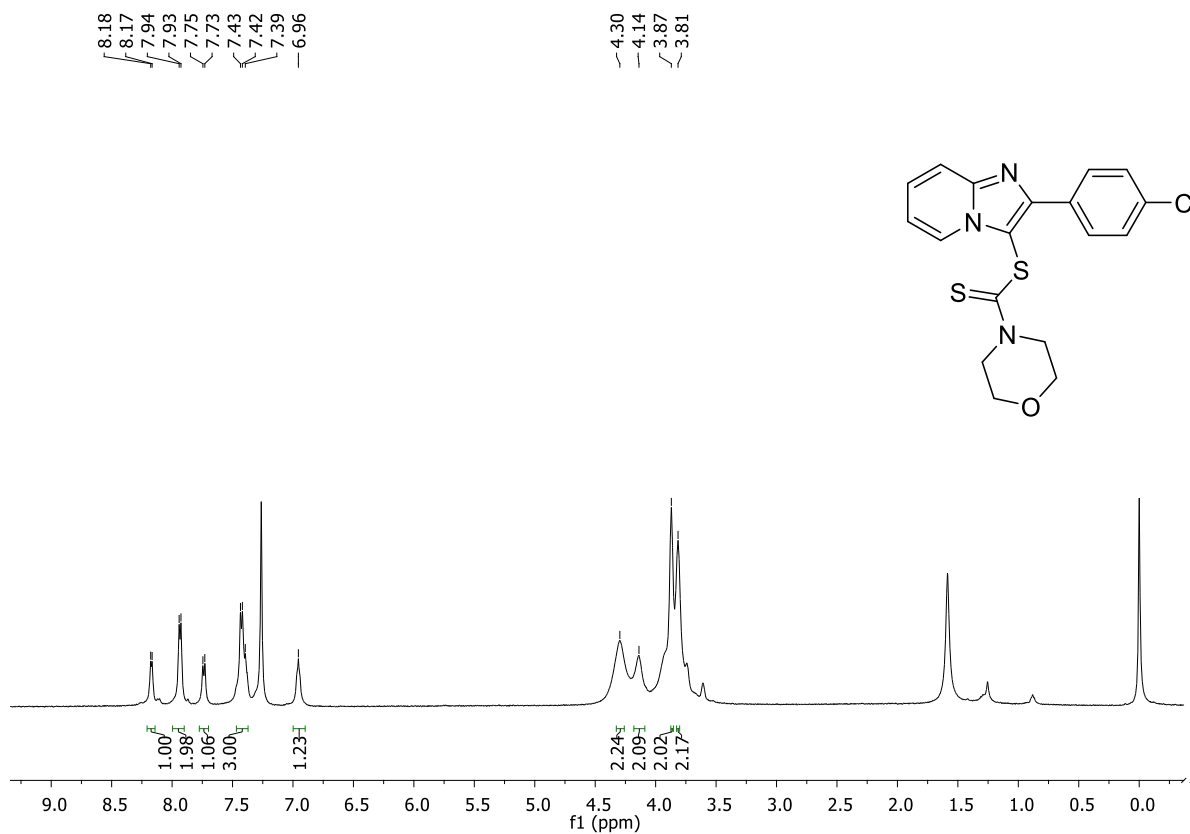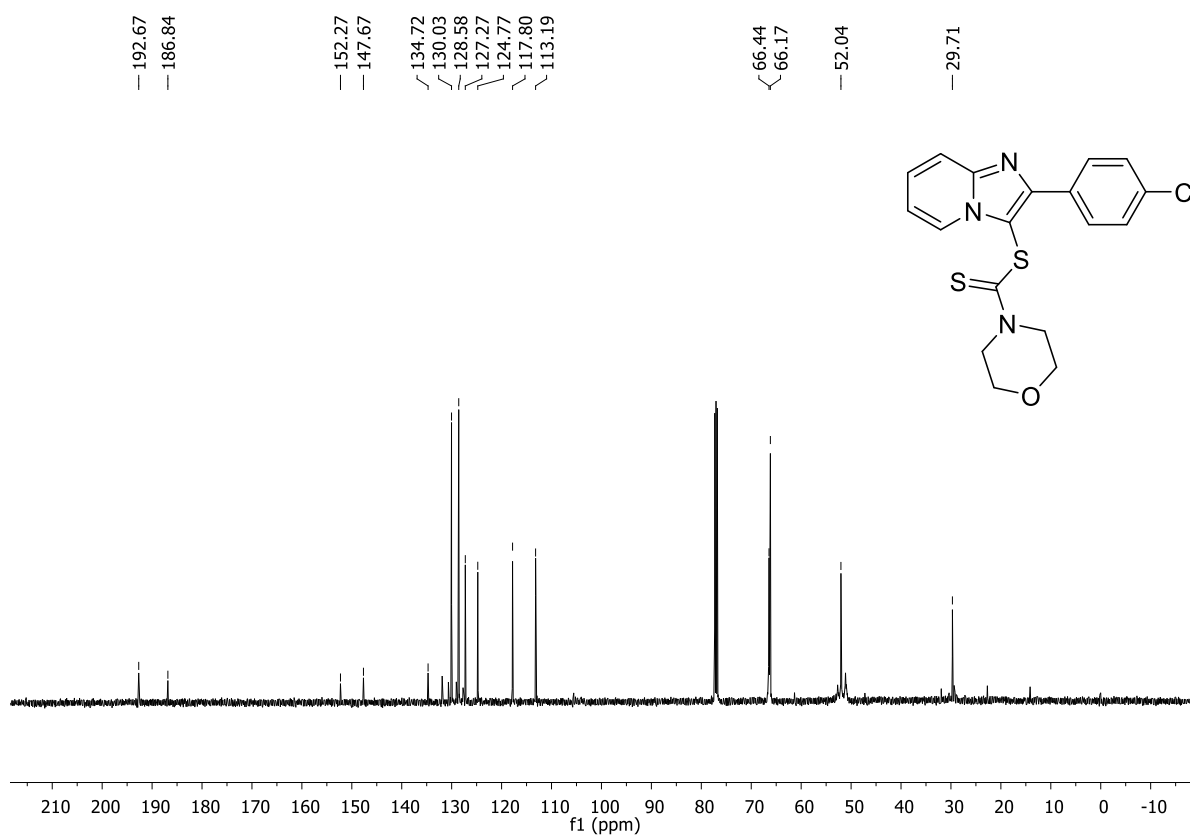

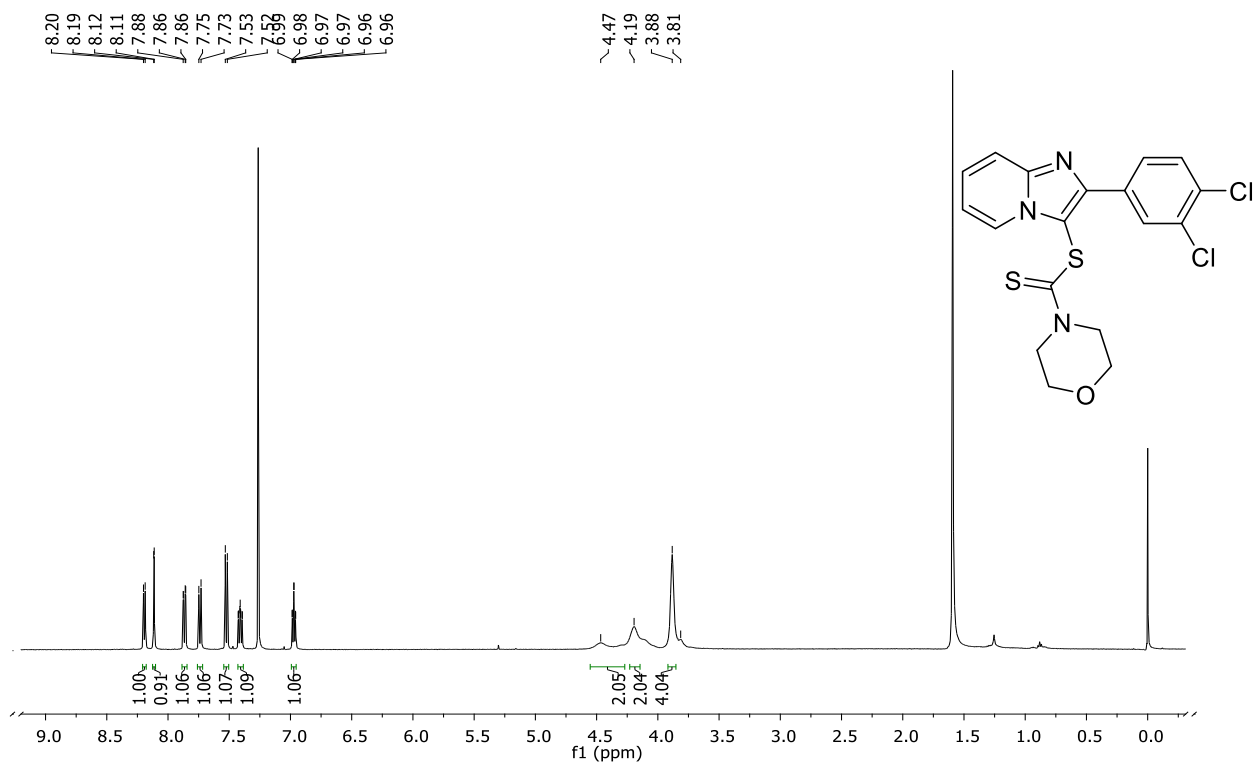

<sup>1</sup>H NMR (500 MHz, DMSO-*d*<sub>6</sub>) spectrum of compound **3fa**

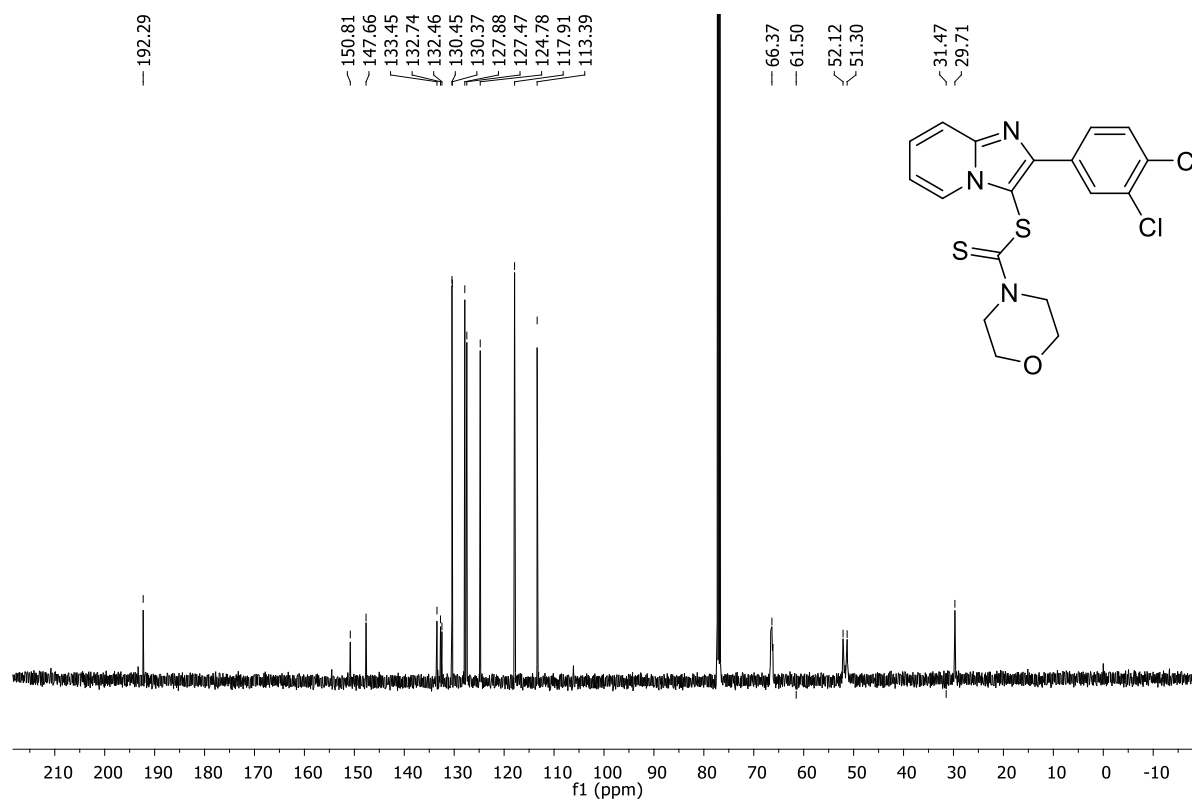

<sup>13</sup>C NMR (125 MHz, DMSO-*d*<sub>6</sub>) spectrum of compound **3fa**

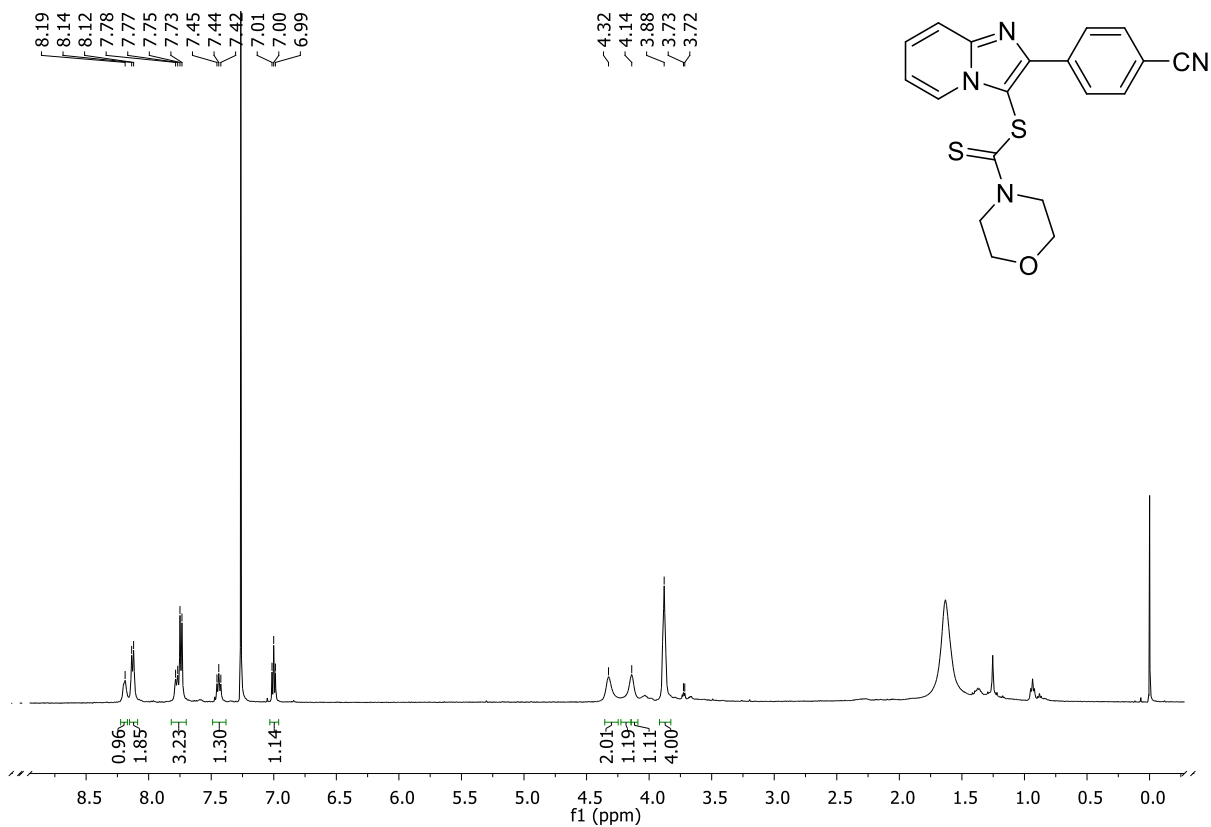

<sup>1</sup>H NMR (500 MHz, DMSO-*d*<sub>6</sub>) spectrum of compound **3ga**

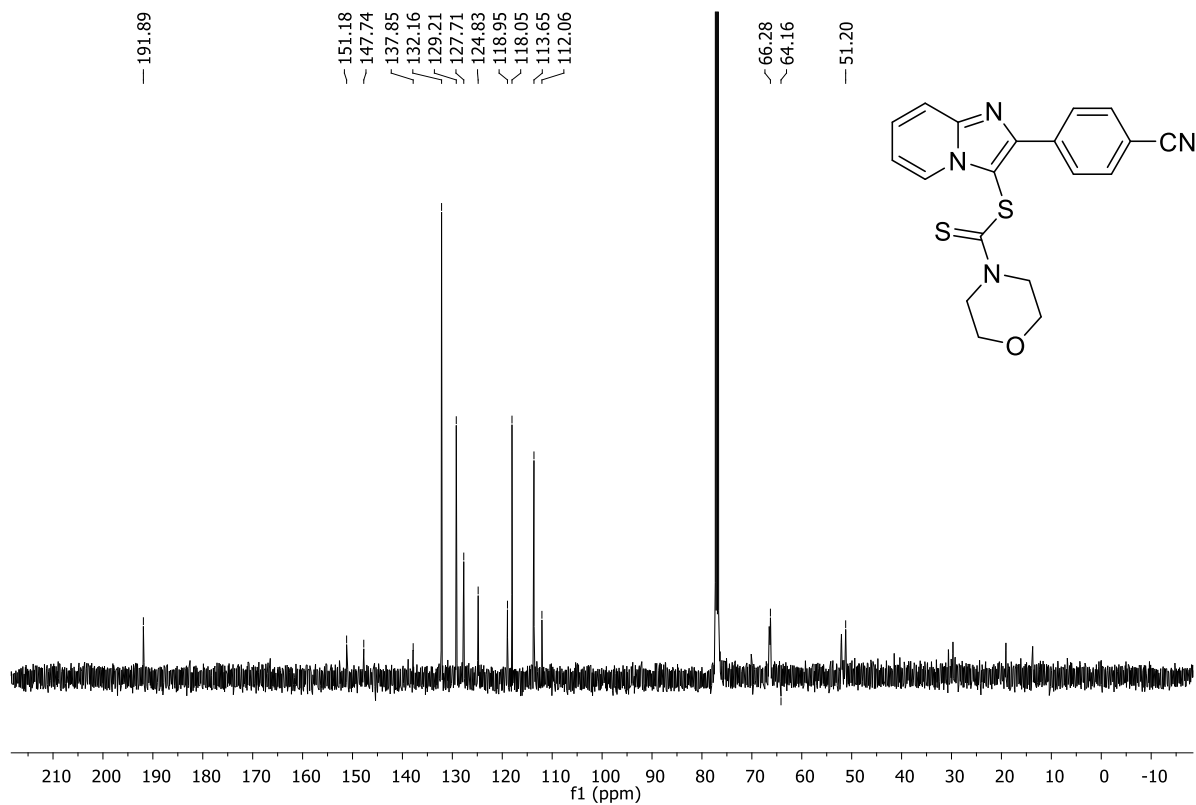

<sup>13</sup>C NMR (125 MHz, DMSO-*d*<sub>6</sub>) spectrum of compound **3ga**

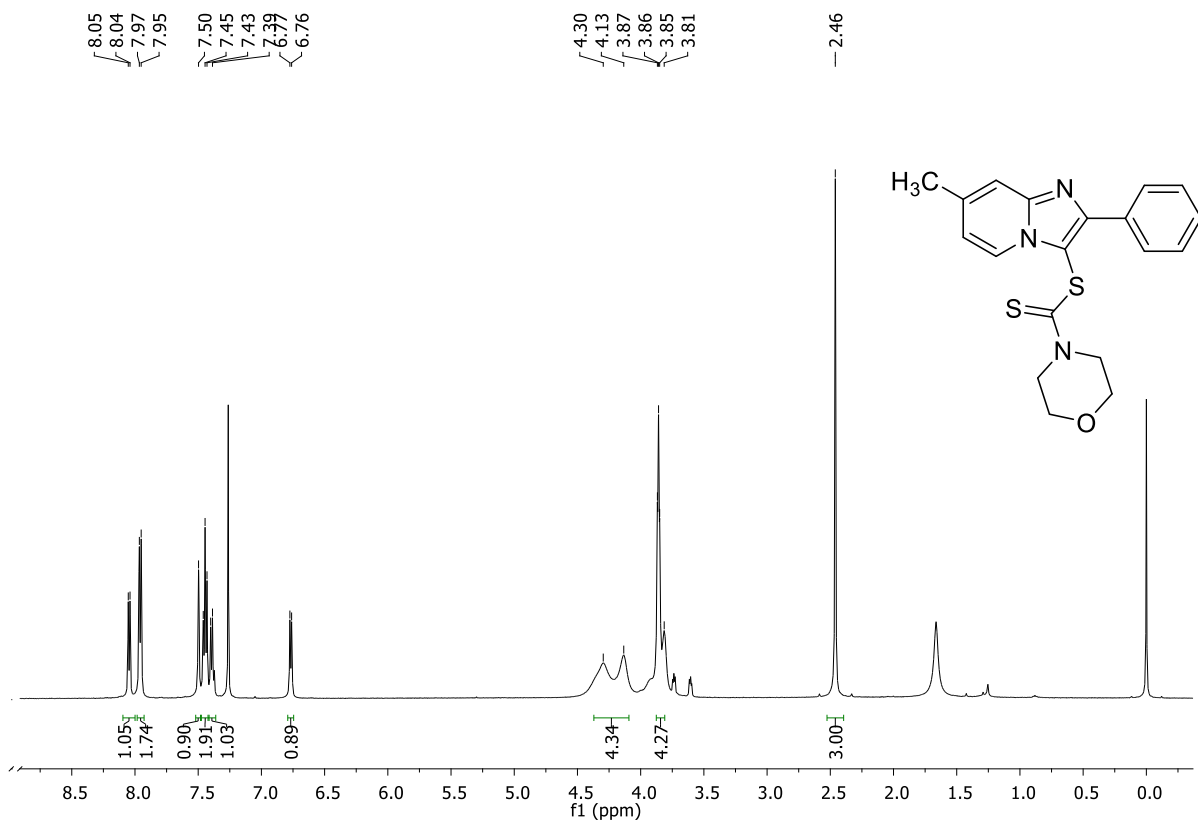

$^1\text{H NMR}$  (500 MHz,  $\text{DMSO-}d_6$ ) spectrum of compound **3ha**

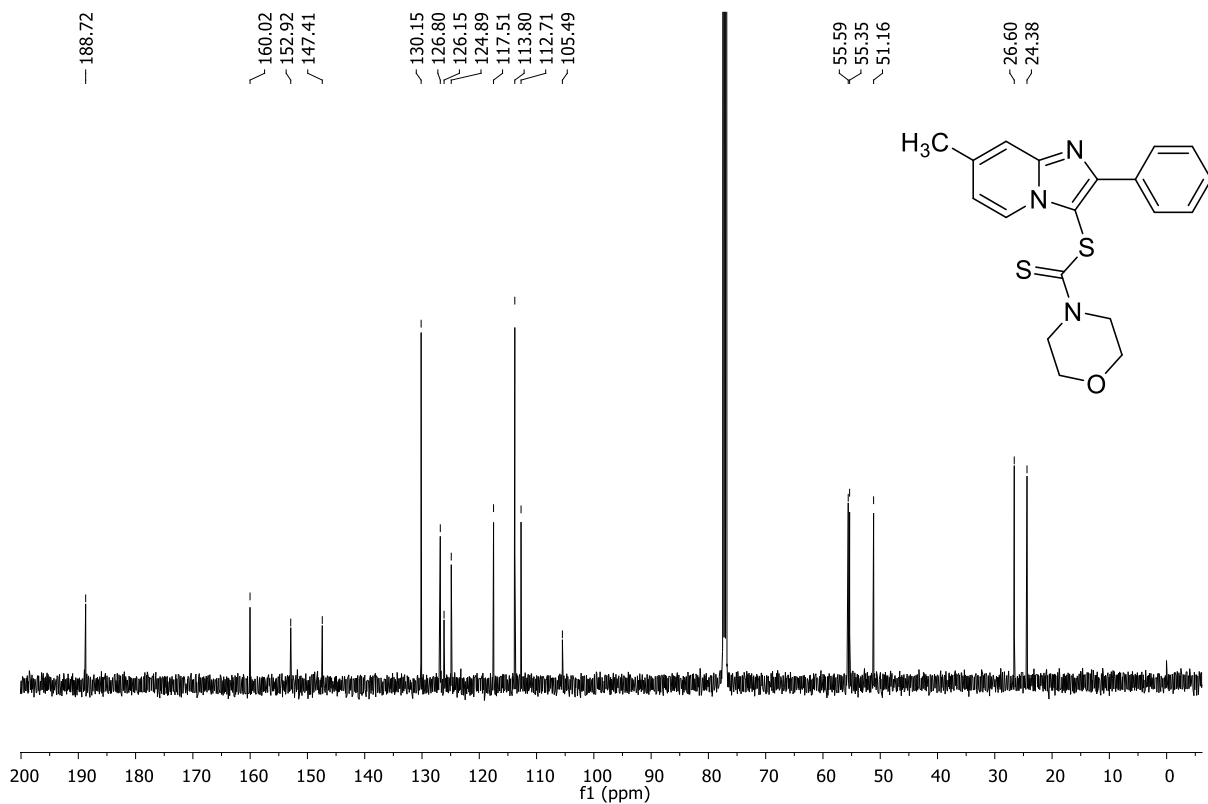

$^{13}\text{C NMR}$  (125 MHz,  $\text{DMSO-}d_6$ ) spectrum of compound **3ha**



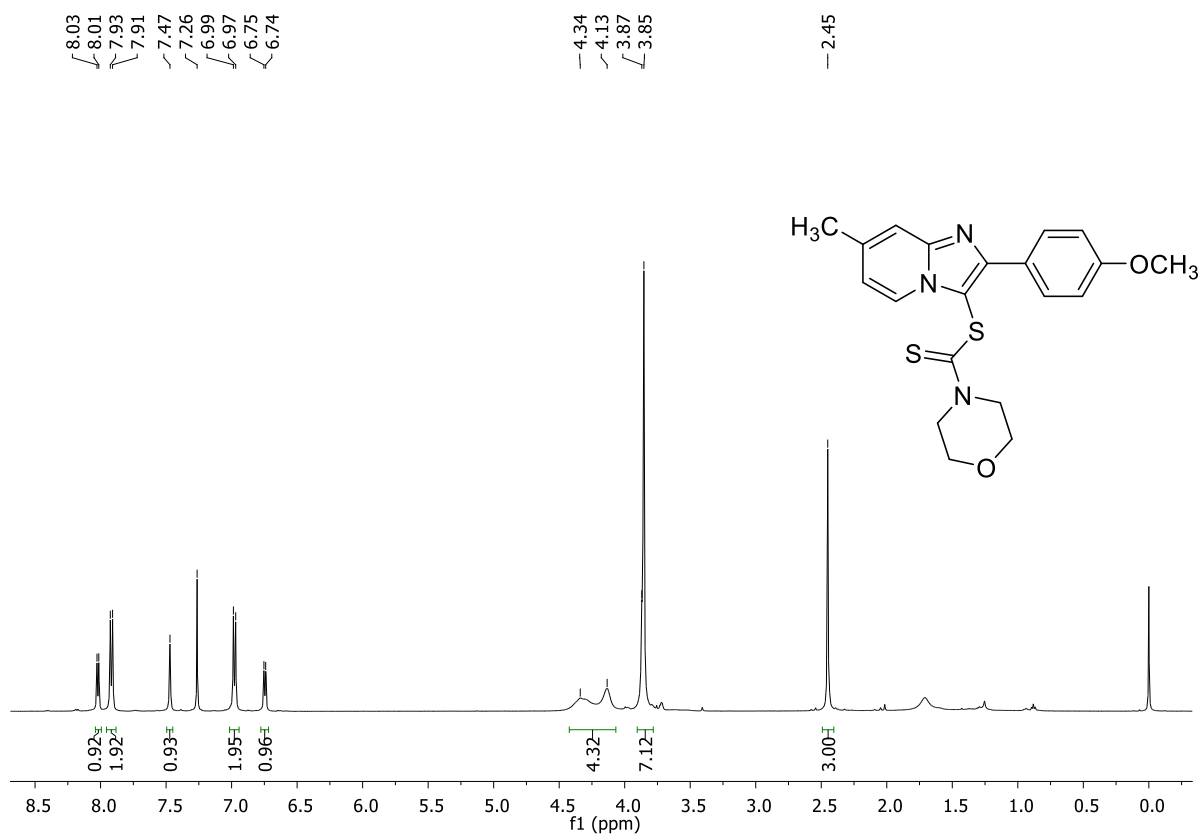

$^1\text{H NMR}$  (500 MHz,  $\text{DMSO-}d_6$ ) spectrum of compound **3ia**

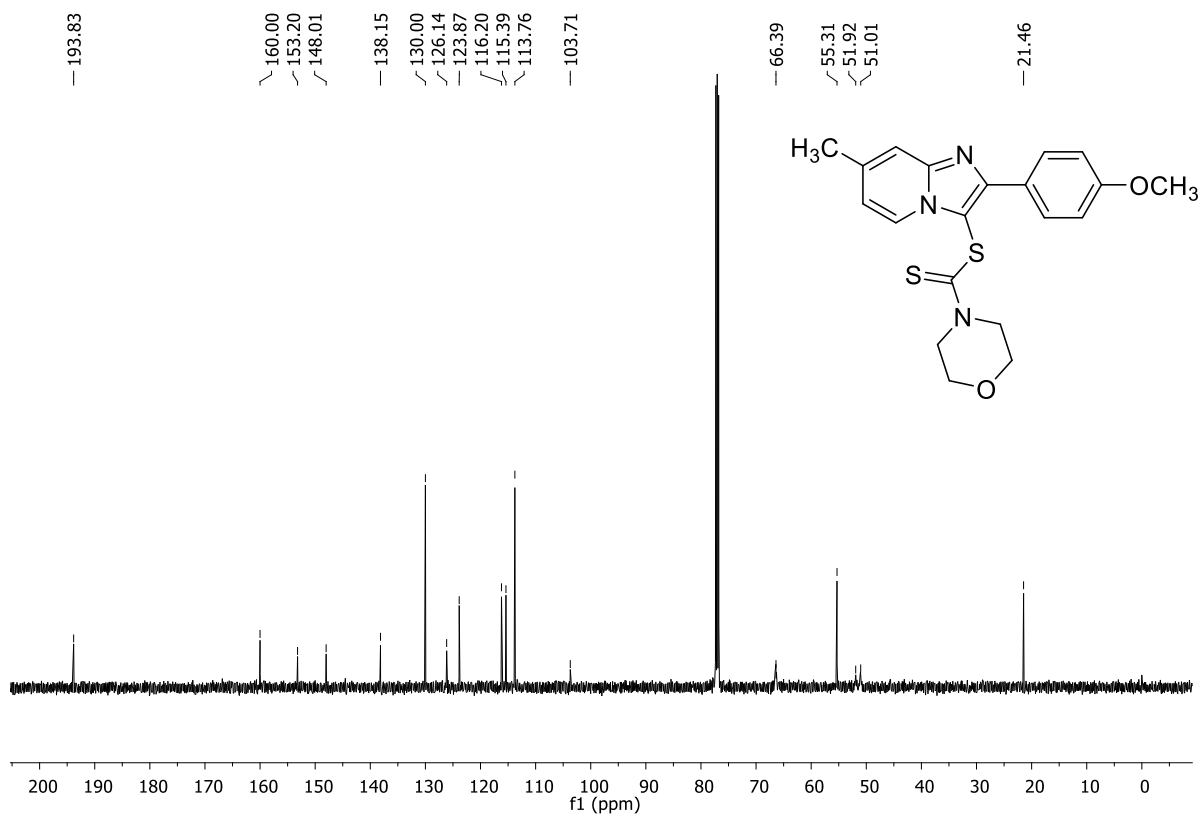

$^{13}\text{C NMR}$  (125 MHz,  $\text{DMSO-}d_6$ ) spectrum of compound **3ia**

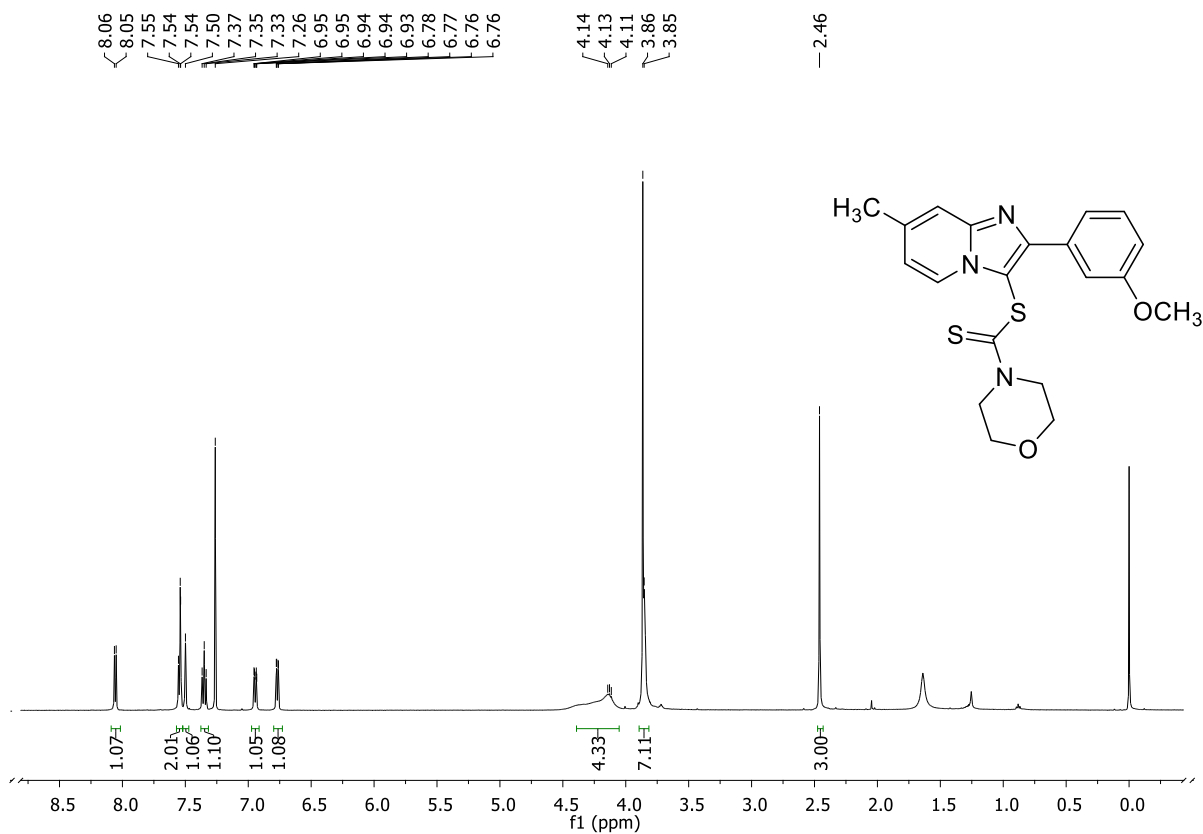

<sup>1</sup>H NMR (500 MHz, DMSO-*d*<sub>6</sub>) spectrum of compound **3ja**

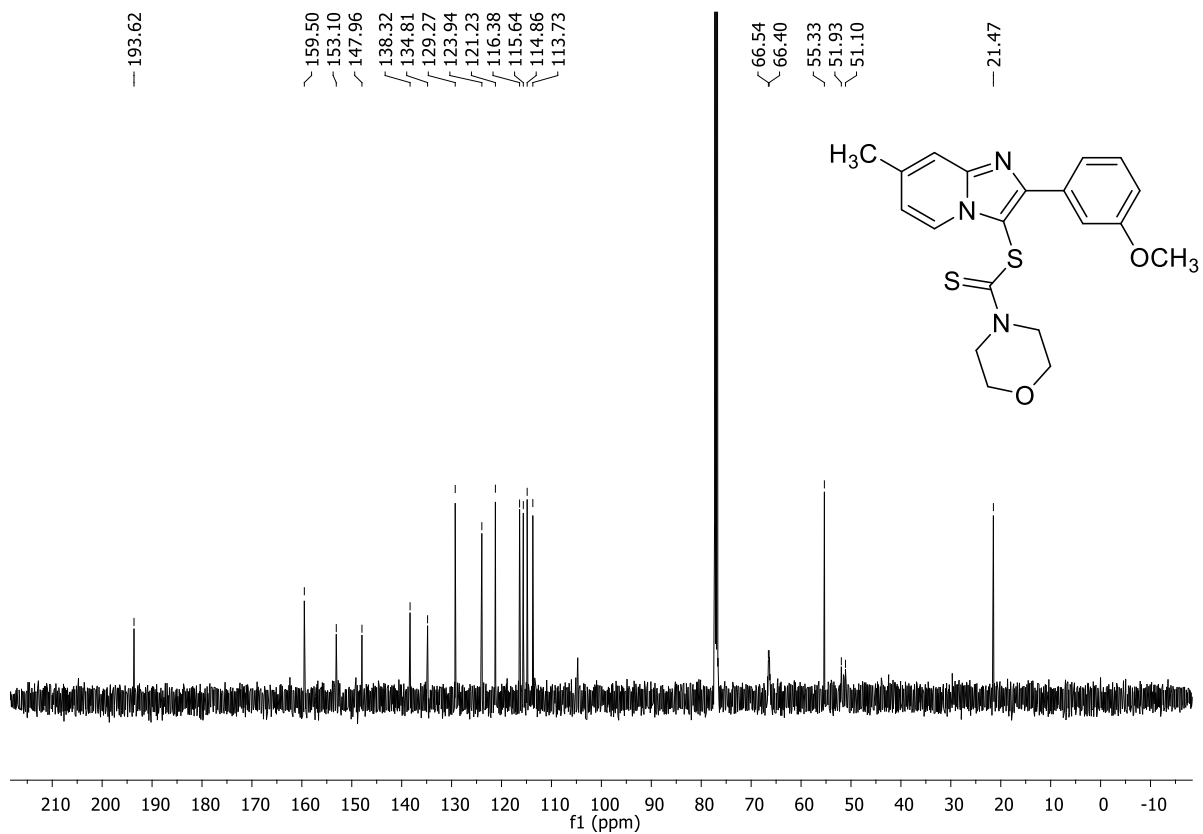

<sup>13</sup>C NMR (125 MHz, DMSO-*d*<sub>6</sub>) spectrum of compound **3ja**

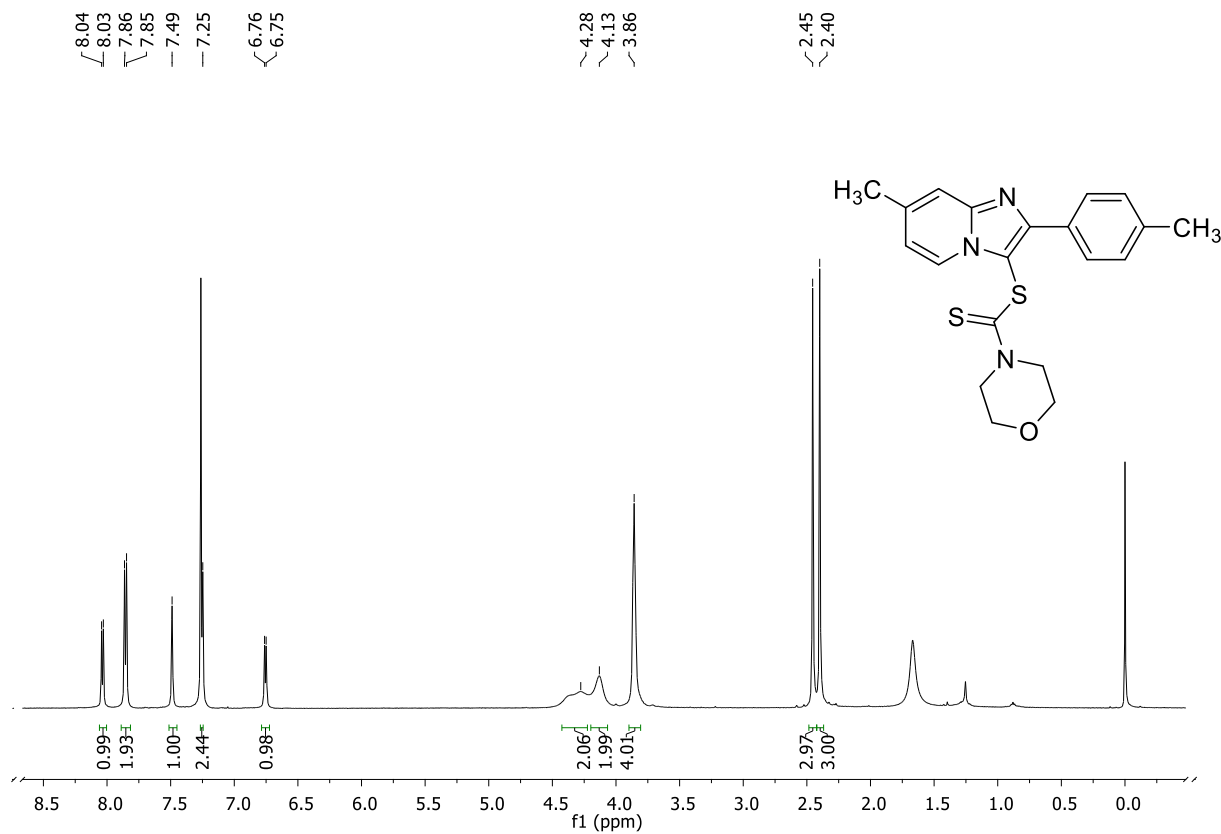

<sup>1</sup>H NMR (500 MHz, DMSO-*d*<sub>6</sub>) spectrum of compound **3ka**

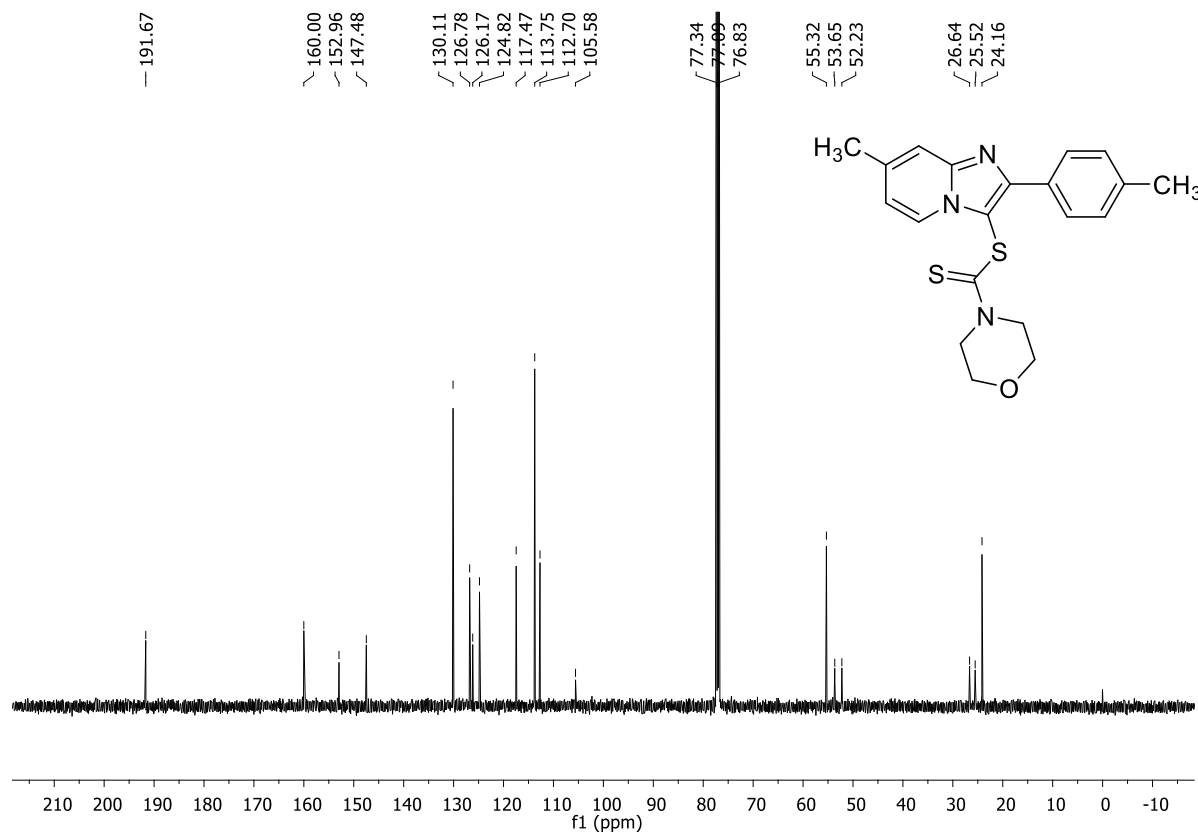

<sup>13</sup>C NMR (125 MHz, DMSO-*d*<sub>6</sub>) spectrum of compound **3ka**

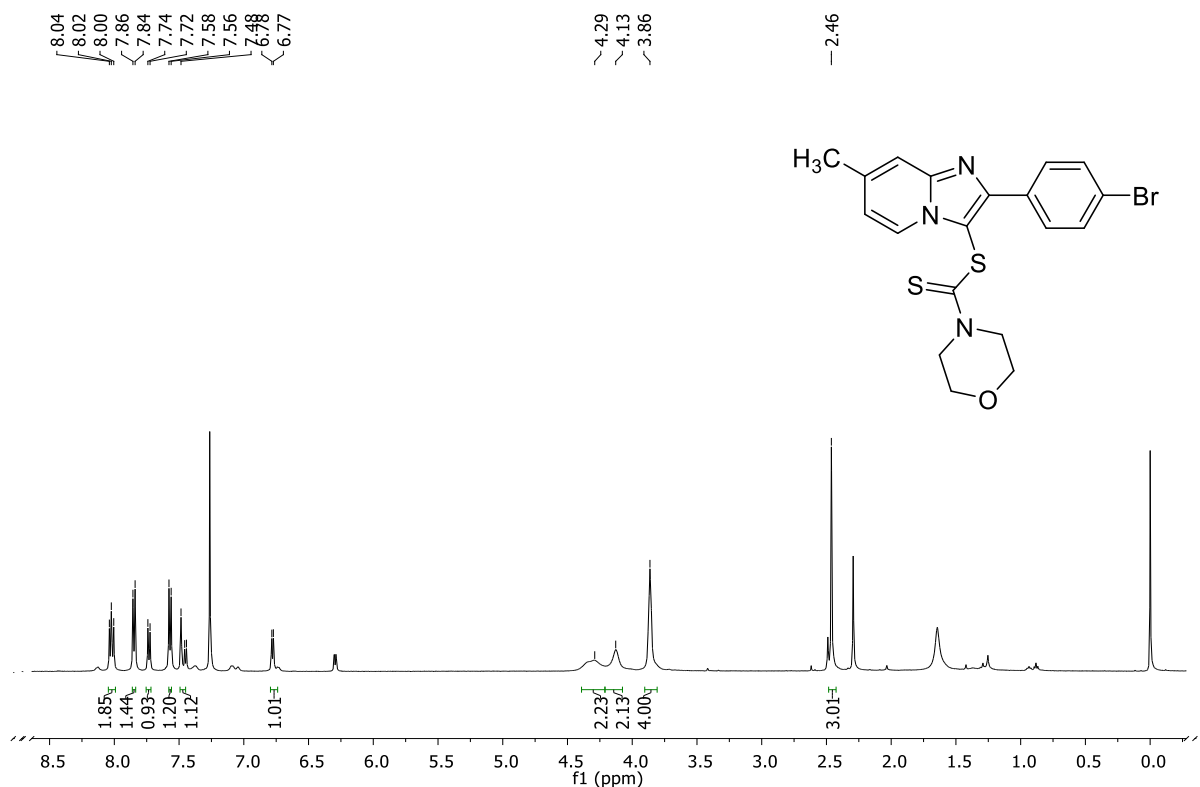

<sup>1</sup>H NMR (500 MHz, DMSO-*d*<sub>6</sub>) spectrum of compound **3la**

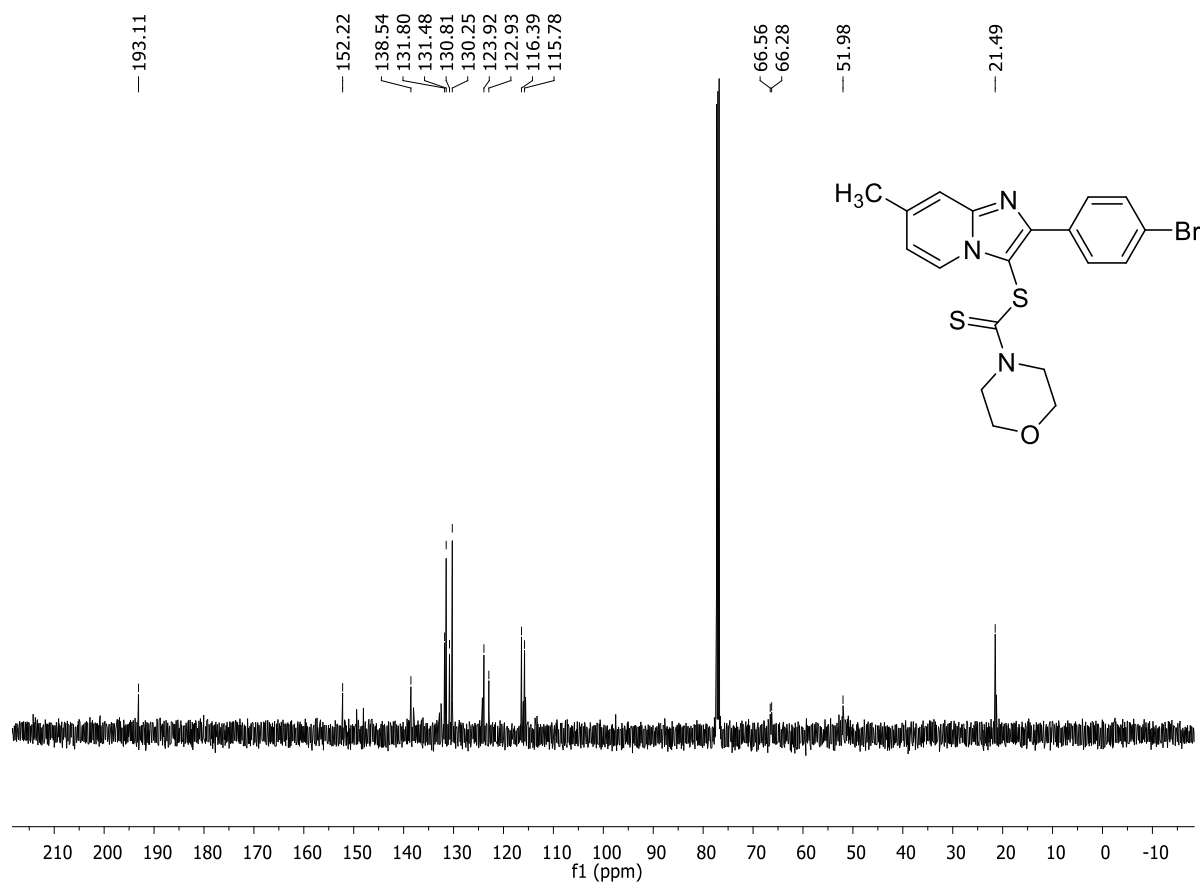

<sup>13</sup>C NMR (125 MHz, DMSO-*d*<sub>6</sub>) spectrum of compound **3la**

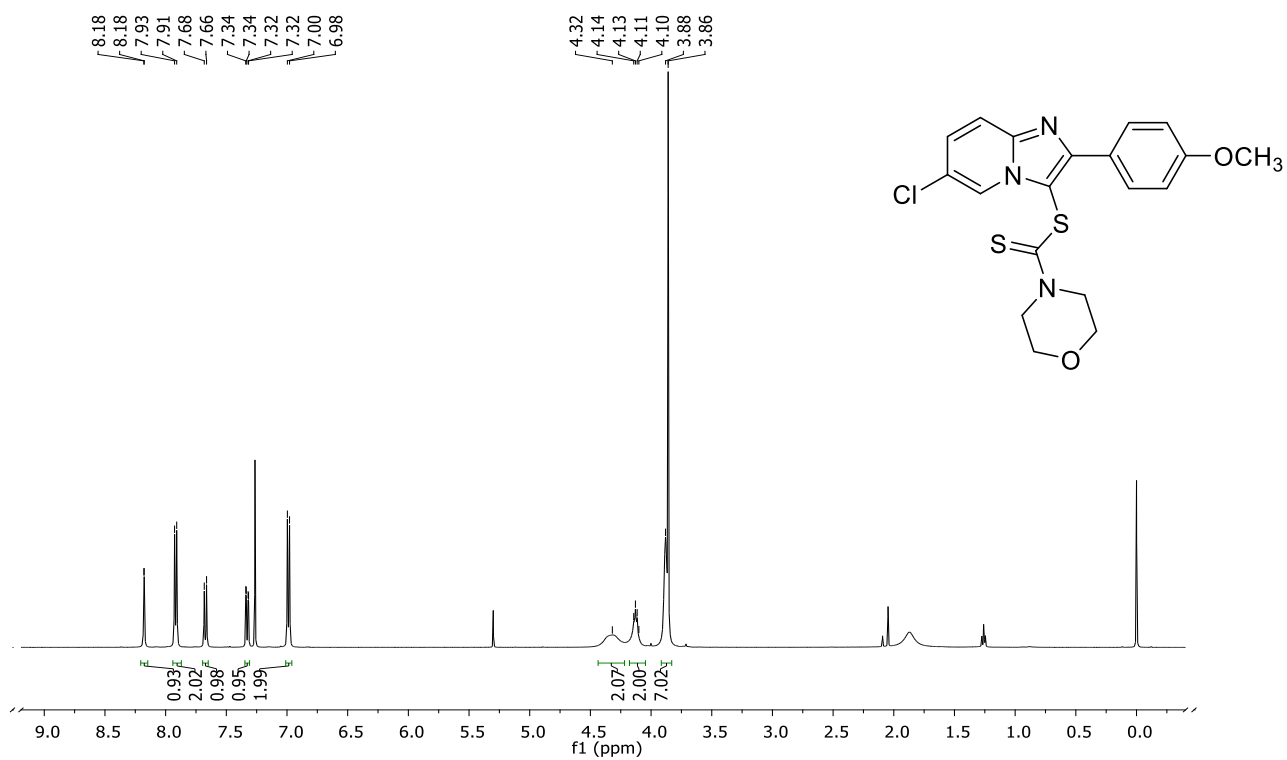

<sup>1</sup>H NMR (500 MHz, DMSO-*d*<sub>6</sub>) spectrum of compound **3ma**

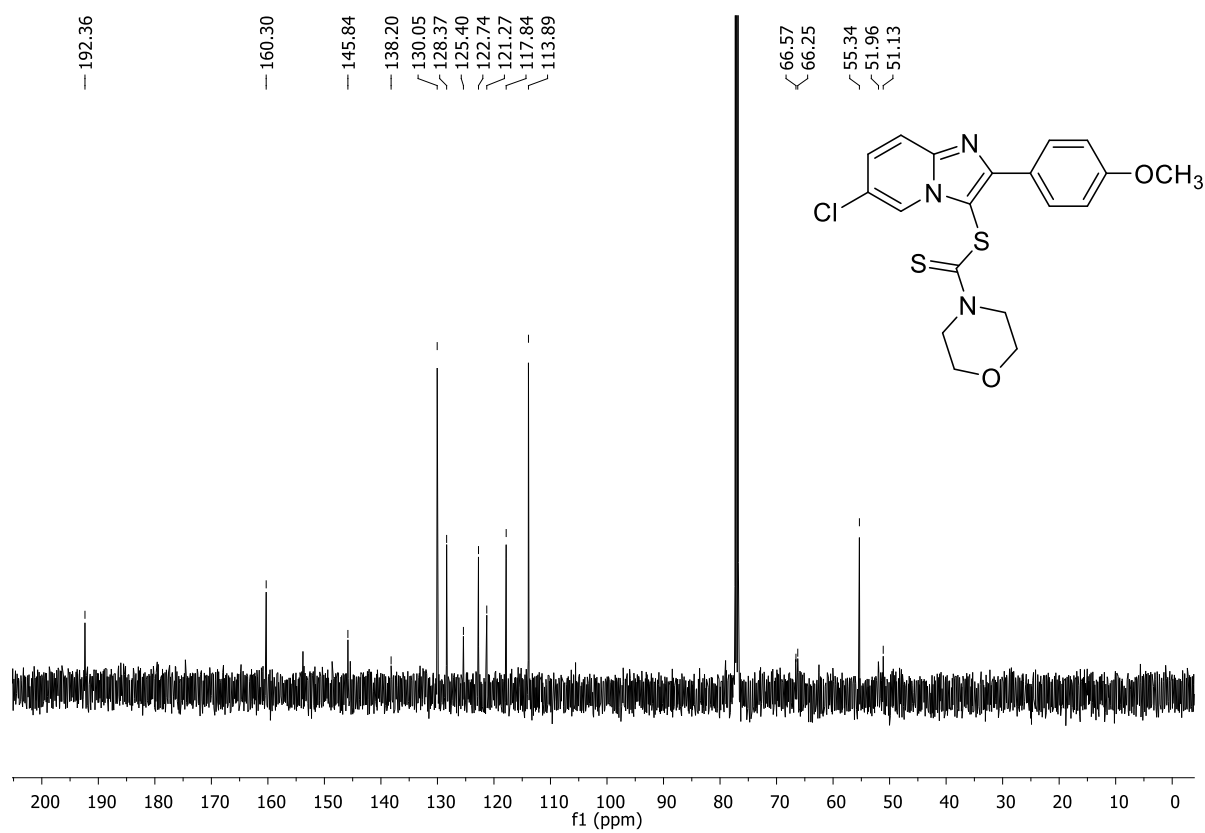

<sup>13</sup>C NMR (125 MHz, DMSO-*d*<sub>6</sub>) spectrum of compound **3ma**

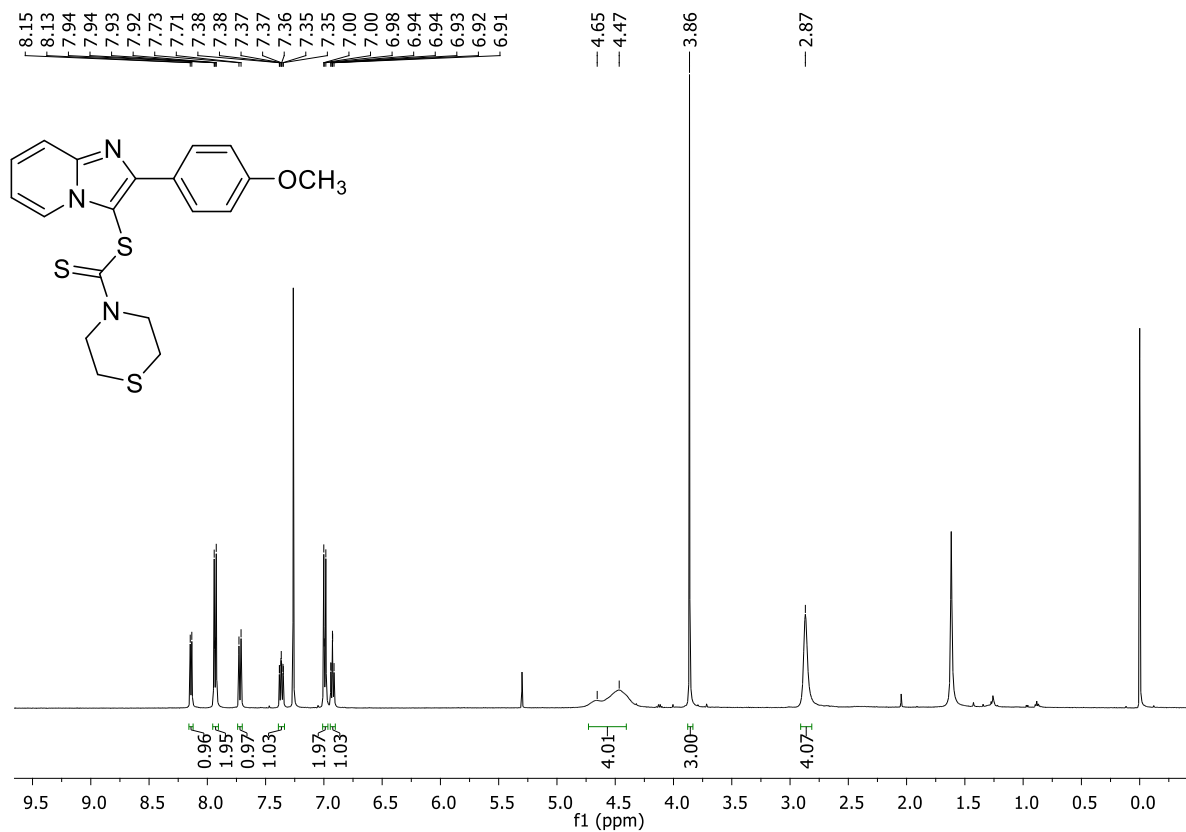

$^1\text{H NMR}$  (500 MHz,  $\text{DMSO}-d_6$ ) spectrum of compound **3bb**

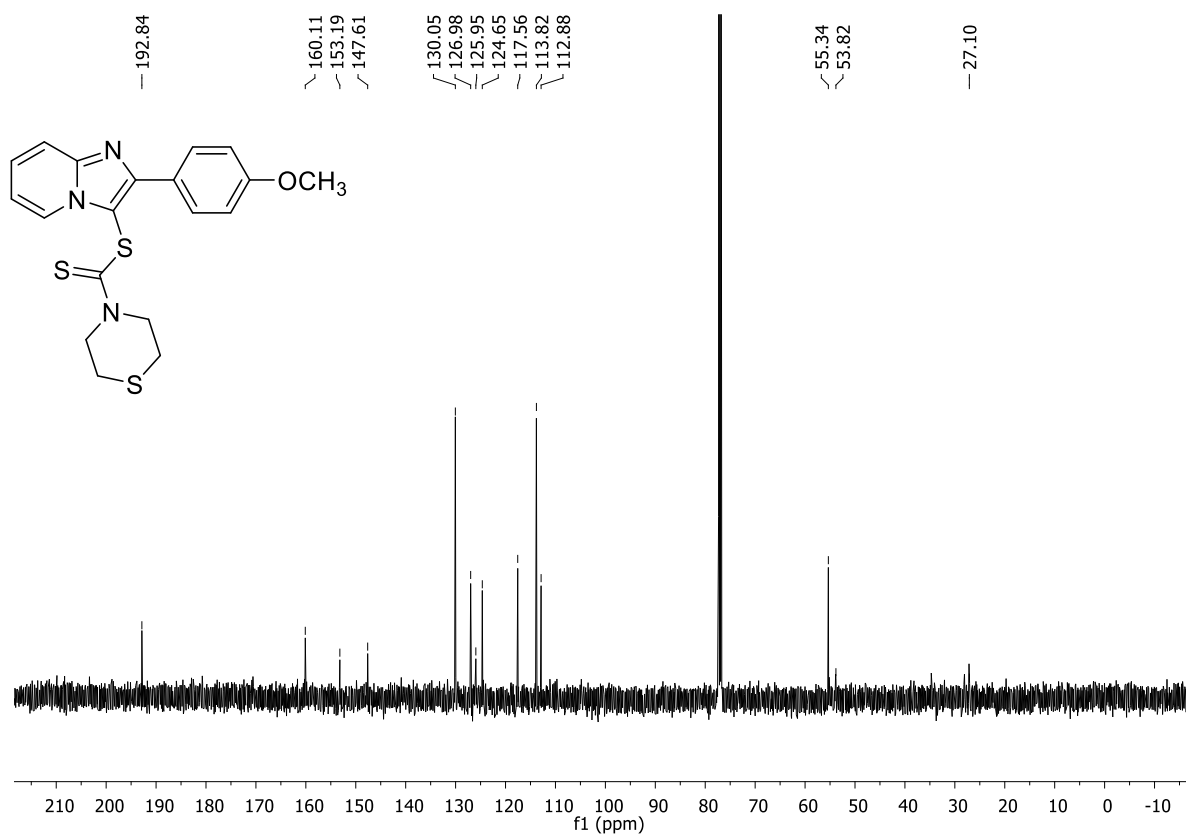

$^{13}\text{C NMR}$  (125 MHz,  $\text{DMSO}-d_6$ ) spectrum of compound **3bb**

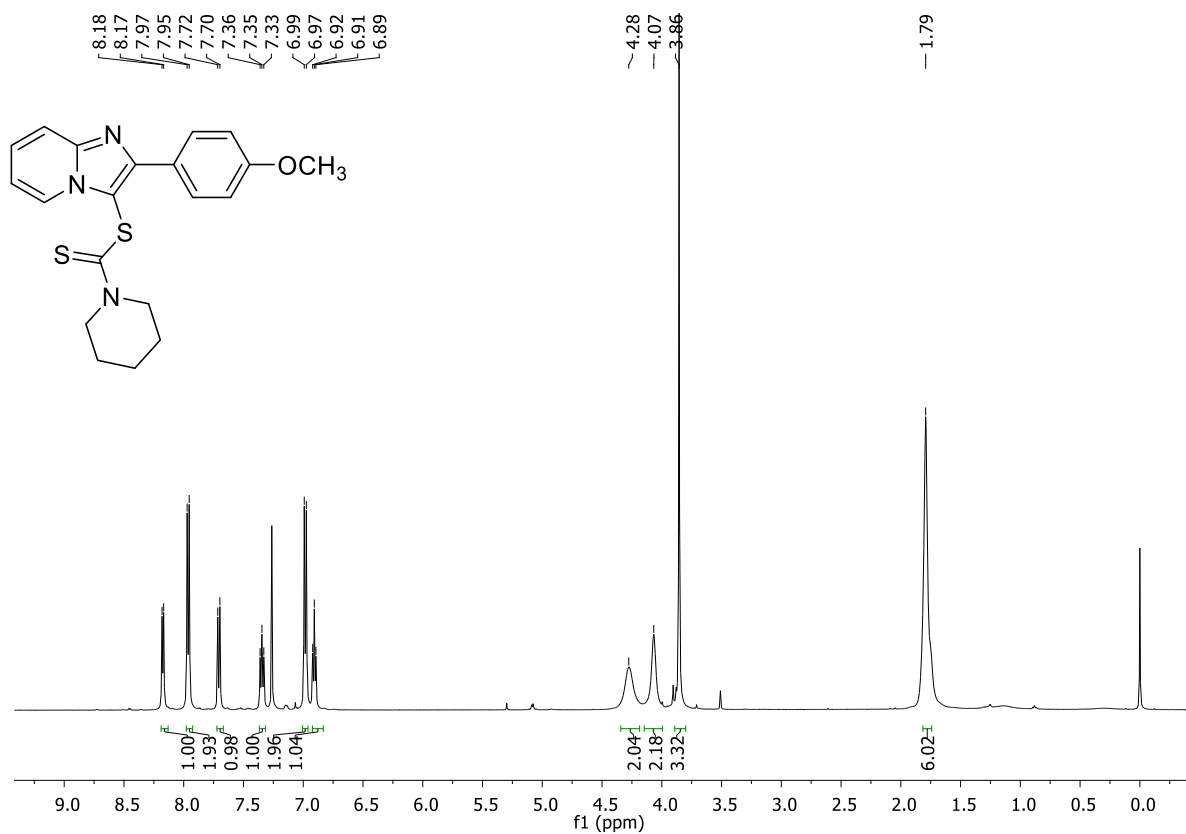

$^1\text{H NMR}$  (500 MHz,  $\text{DMSO}-d_6$ ) spectrum of compound **3bc**

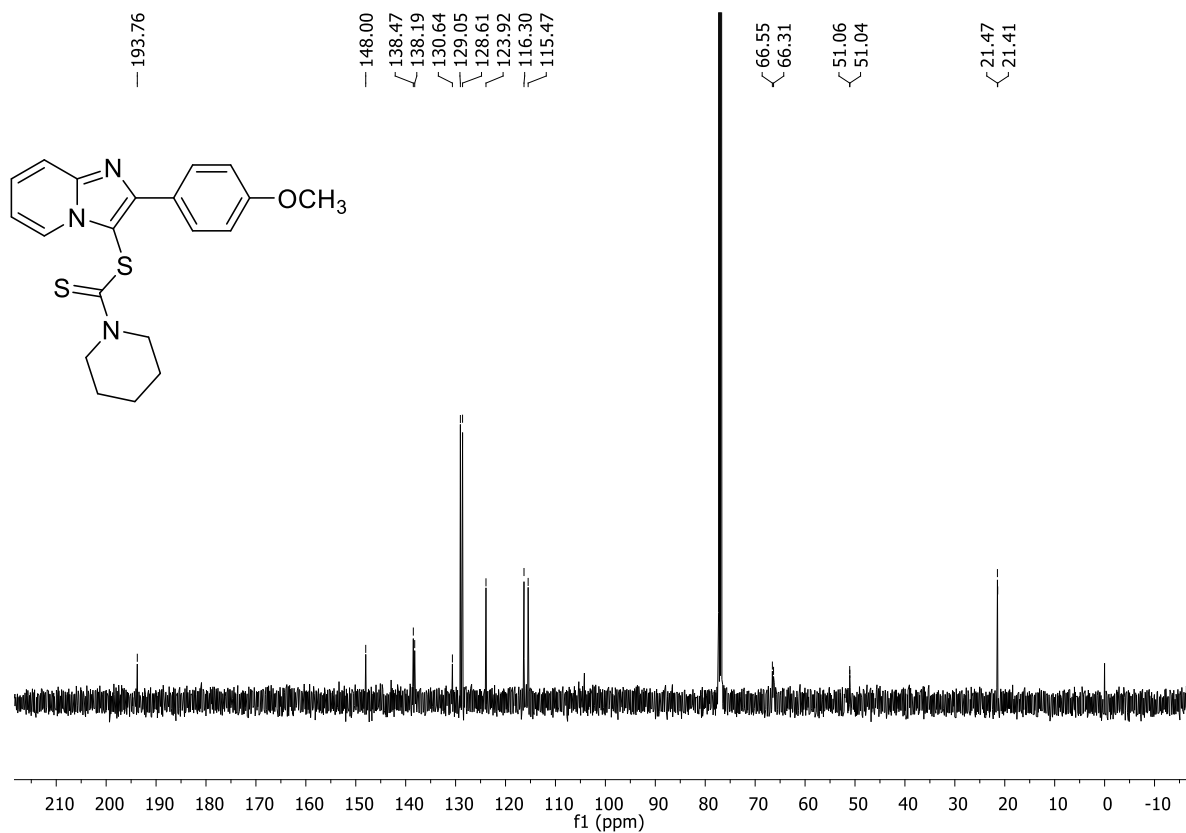

$^{13}\text{C NMR}$  (125 MHz,  $\text{DMSO}-d_6$ ) spectrum of compound **3bc**

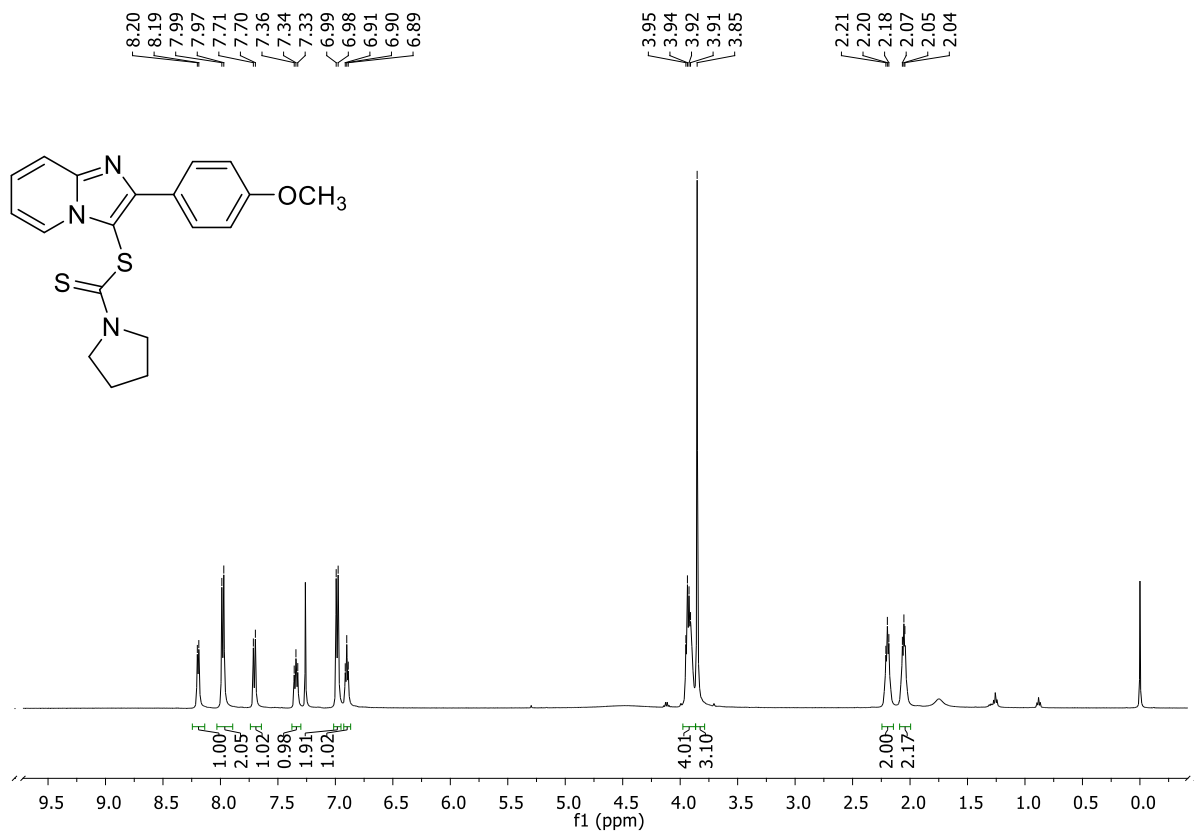

<sup>1</sup>H NMR (500 MHz, DMSO-*d*<sub>6</sub>) spectrum of compound **3bd**

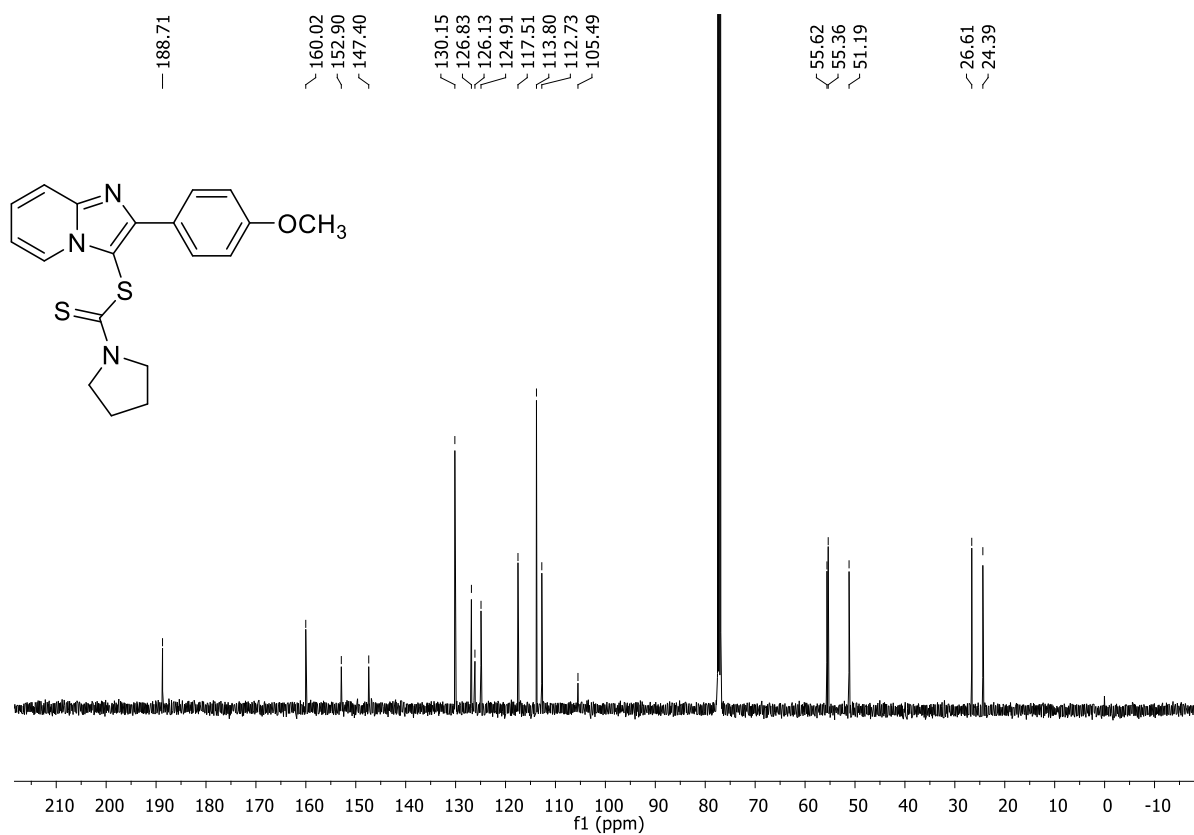

<sup>13</sup>C NMR (125 MHz, DMSO-*d*<sub>6</sub>) spectrum of compound **3bd**



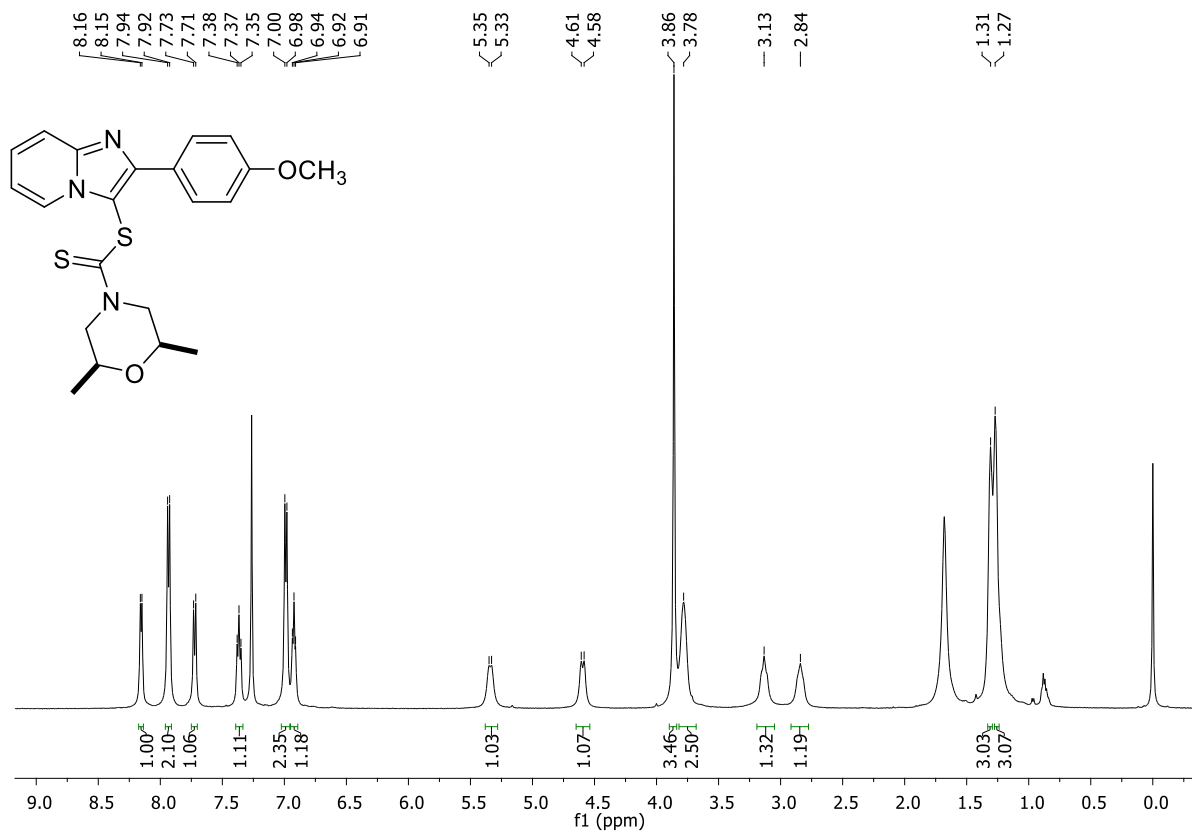

<sup>1</sup>H NMR (500 MHz, DMSO-*d*<sub>6</sub>) spectrum of compound **3be**

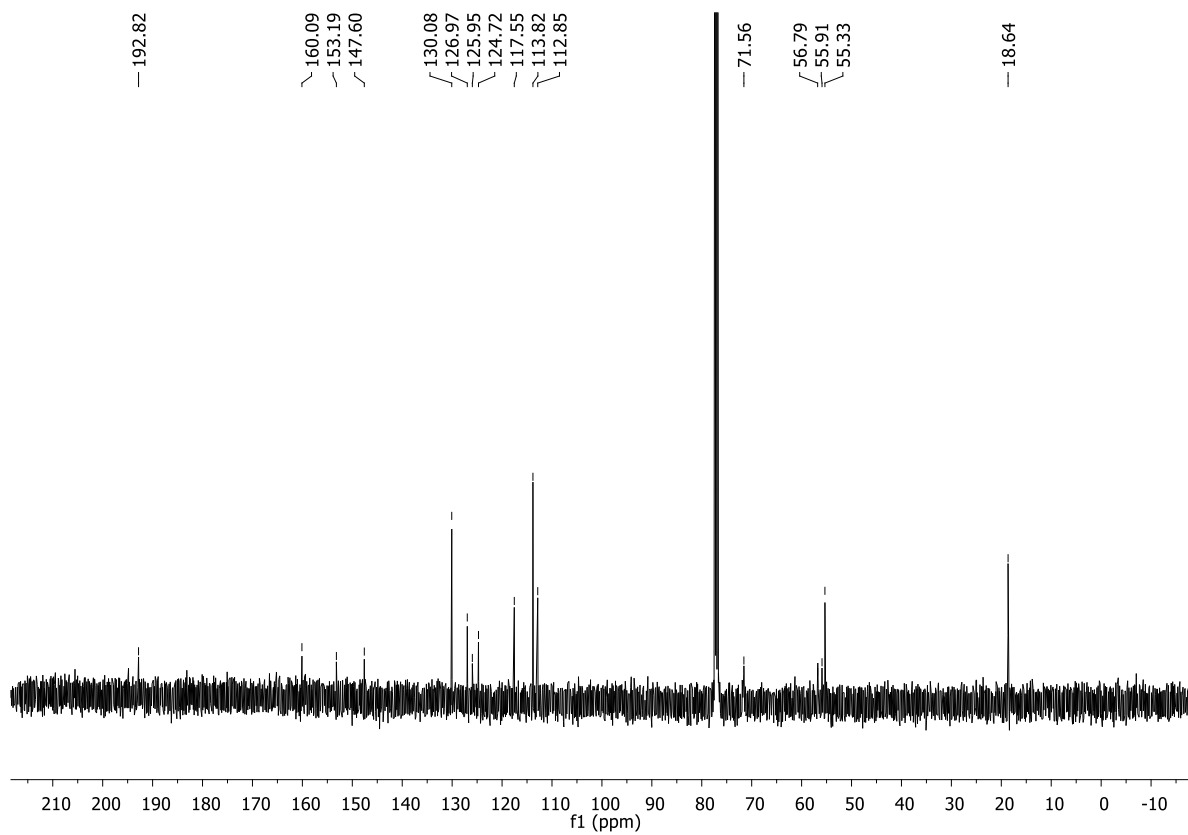

<sup>13</sup>C NMR (125 MHz, DMSO-*d*<sub>6</sub>) spectrum of compound **3be**

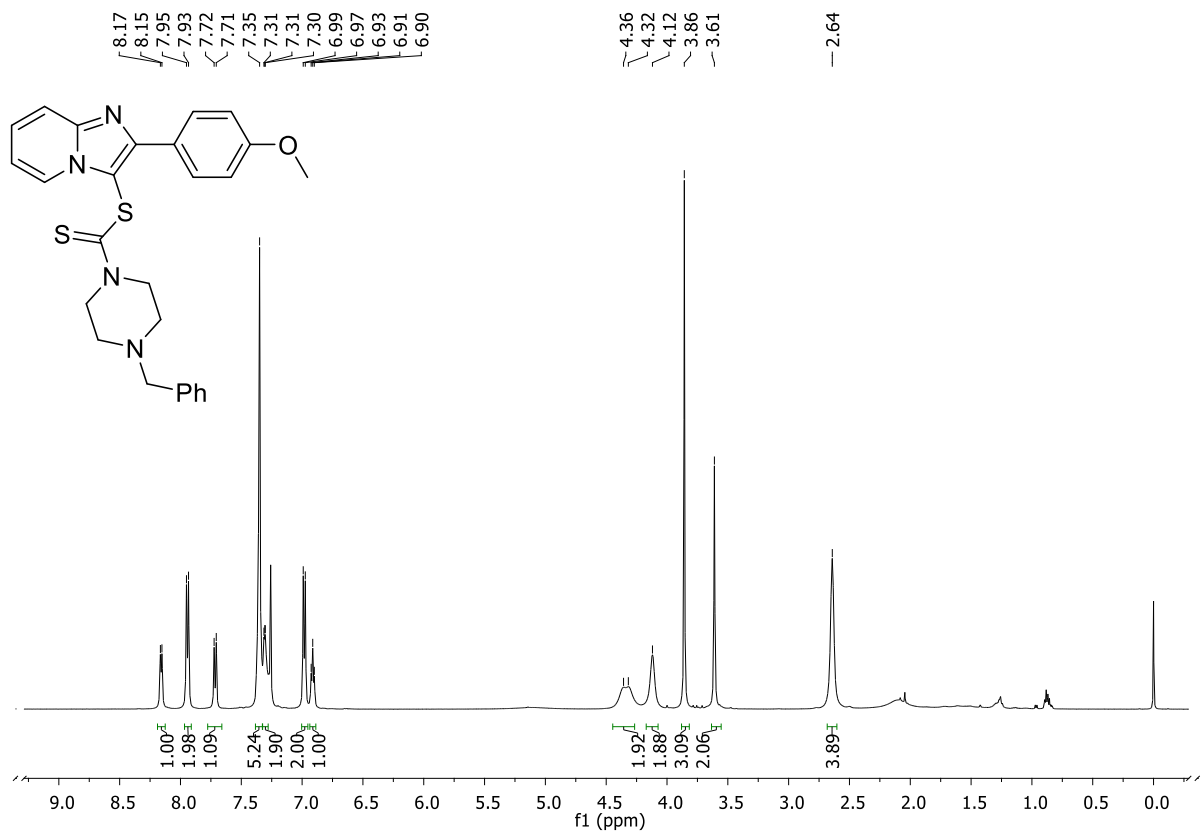

<sup>1</sup>H NMR (500 MHz, DMSO-*d*<sub>6</sub>) spectrum of compound **3bf**

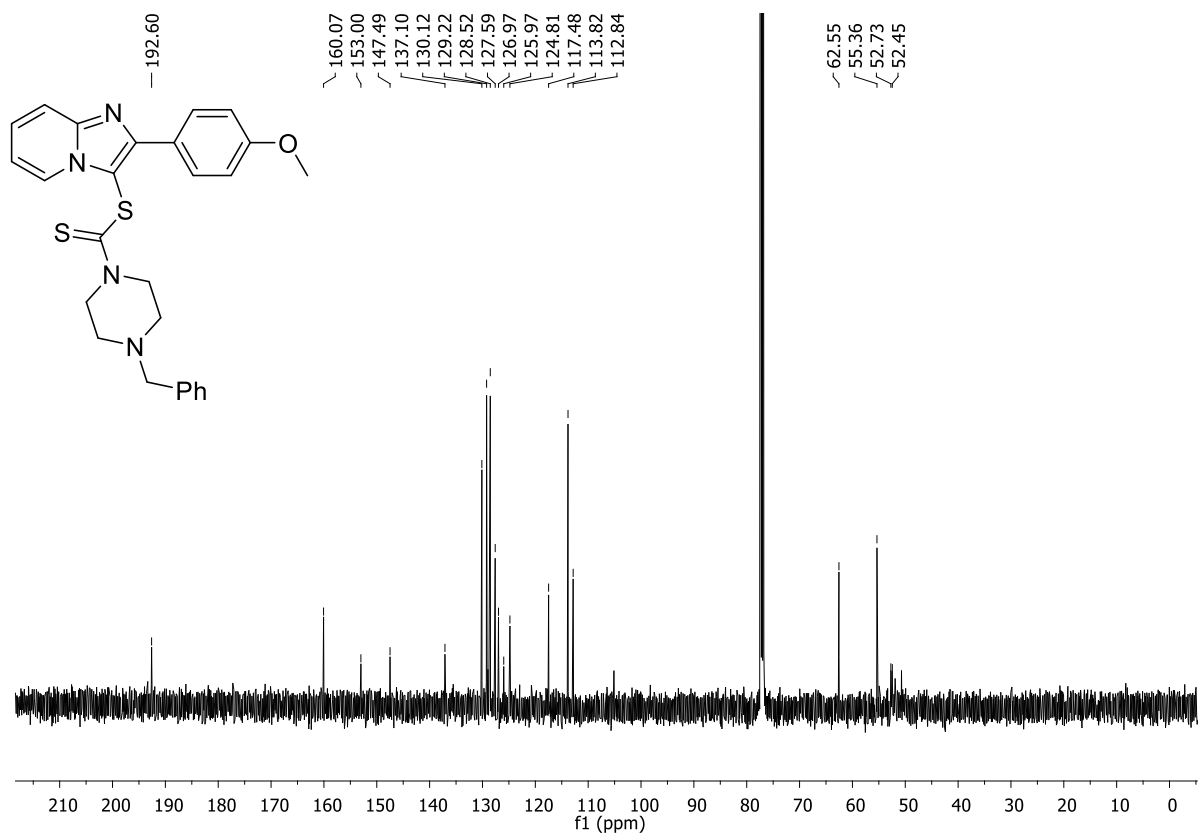

<sup>13</sup>C NMR (125 MHz, DMSO-*d*<sub>6</sub>) spectrum of compound **3bf**

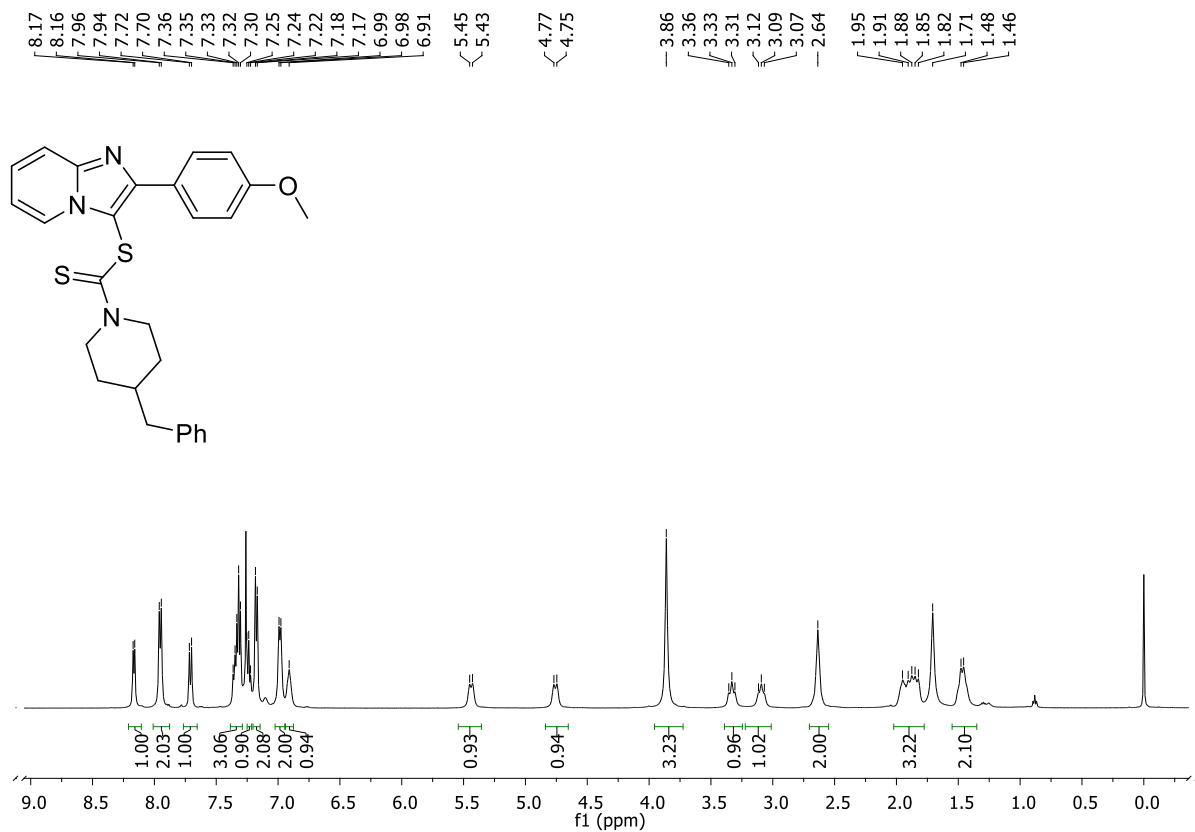

$^1\text{H NMR}$  (500 MHz,  $\text{DMSO}-d_6$ ) spectrum of compound **3bg**

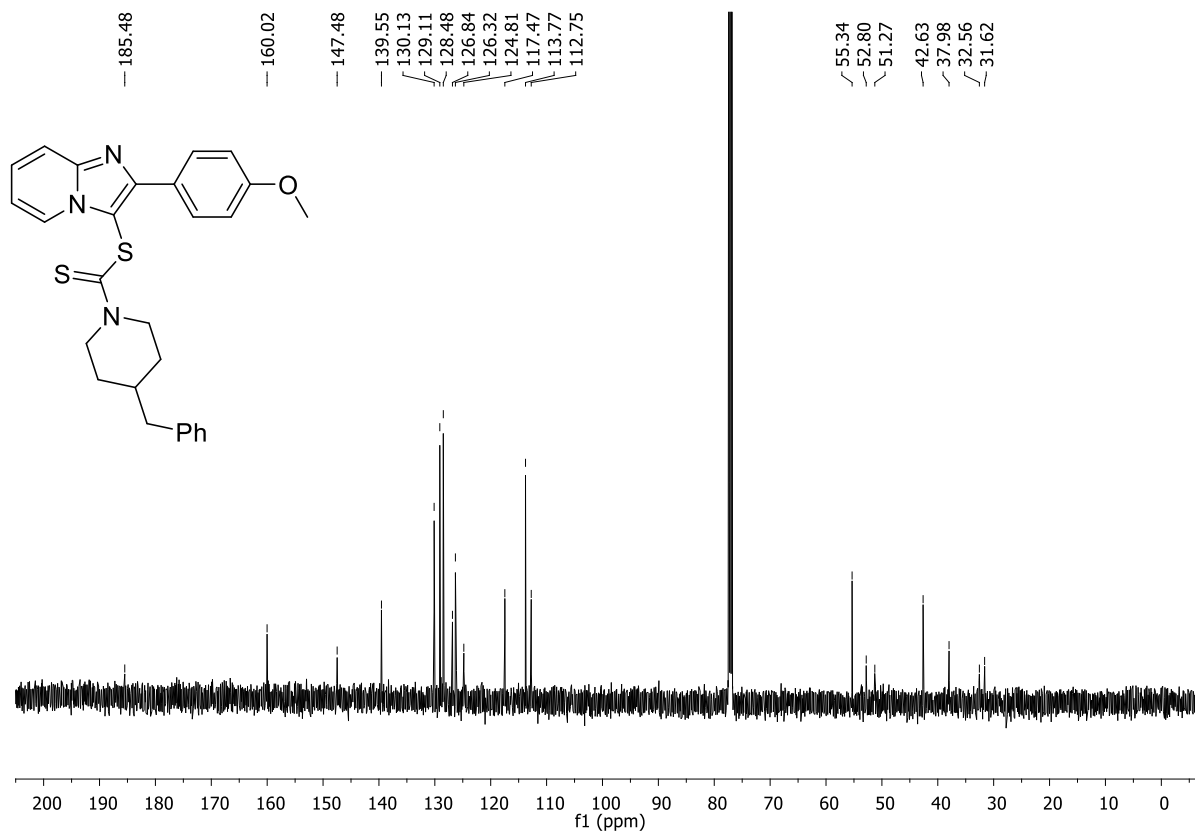

$^{13}\text{C NMR}$  (125 MHz,  $\text{DMSO}-d_6$ ) spectrum of compound **3g**

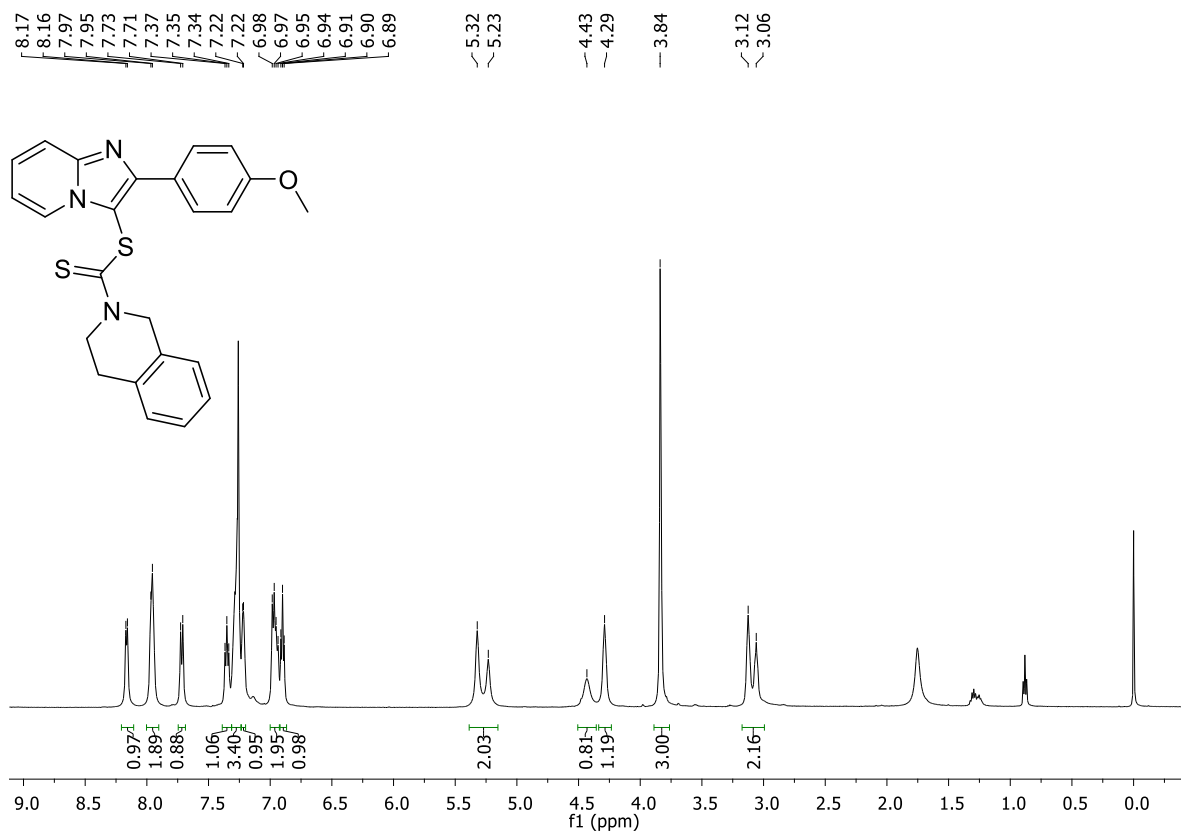

<sup>1</sup>H NMR (500 MHz, DMSO-*d*<sub>6</sub>) spectrum of compound **3bh**

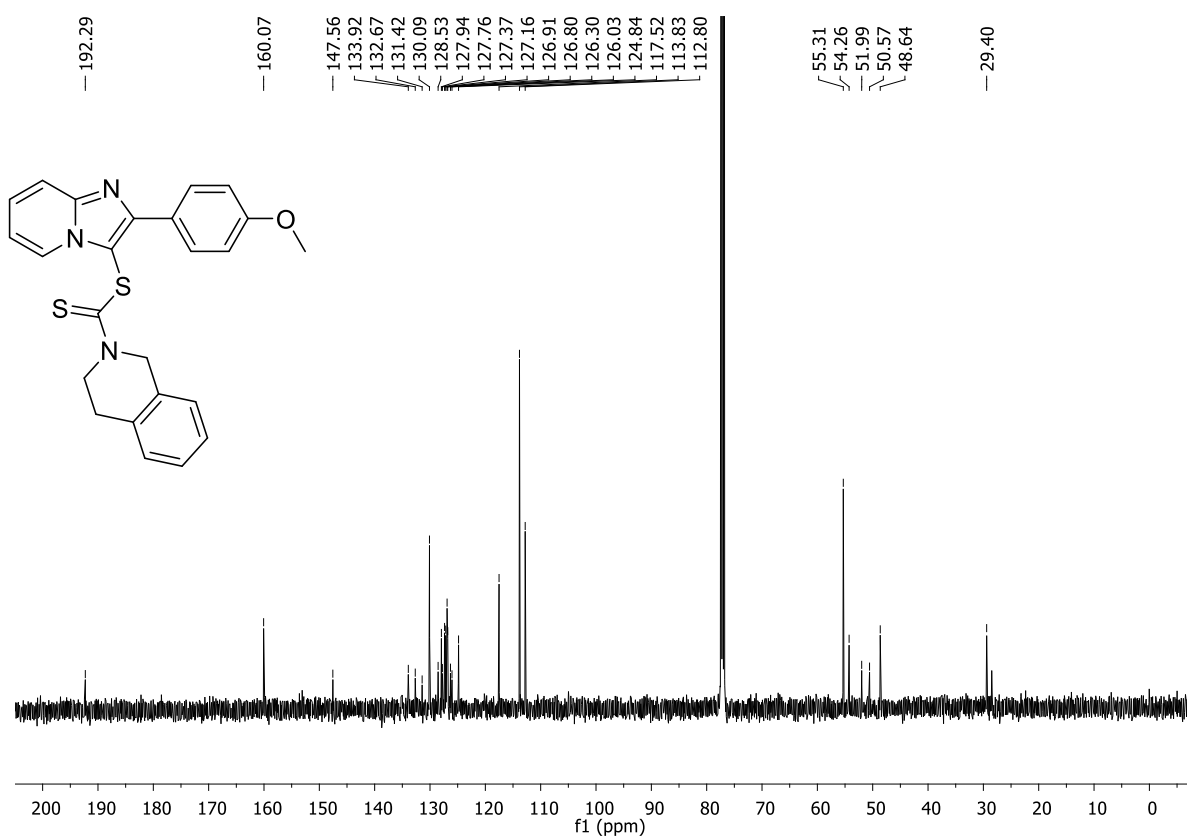

<sup>13</sup>C NMR (125 MHz, DMSO-*d*<sub>6</sub>) spectrum of compound **3bh**

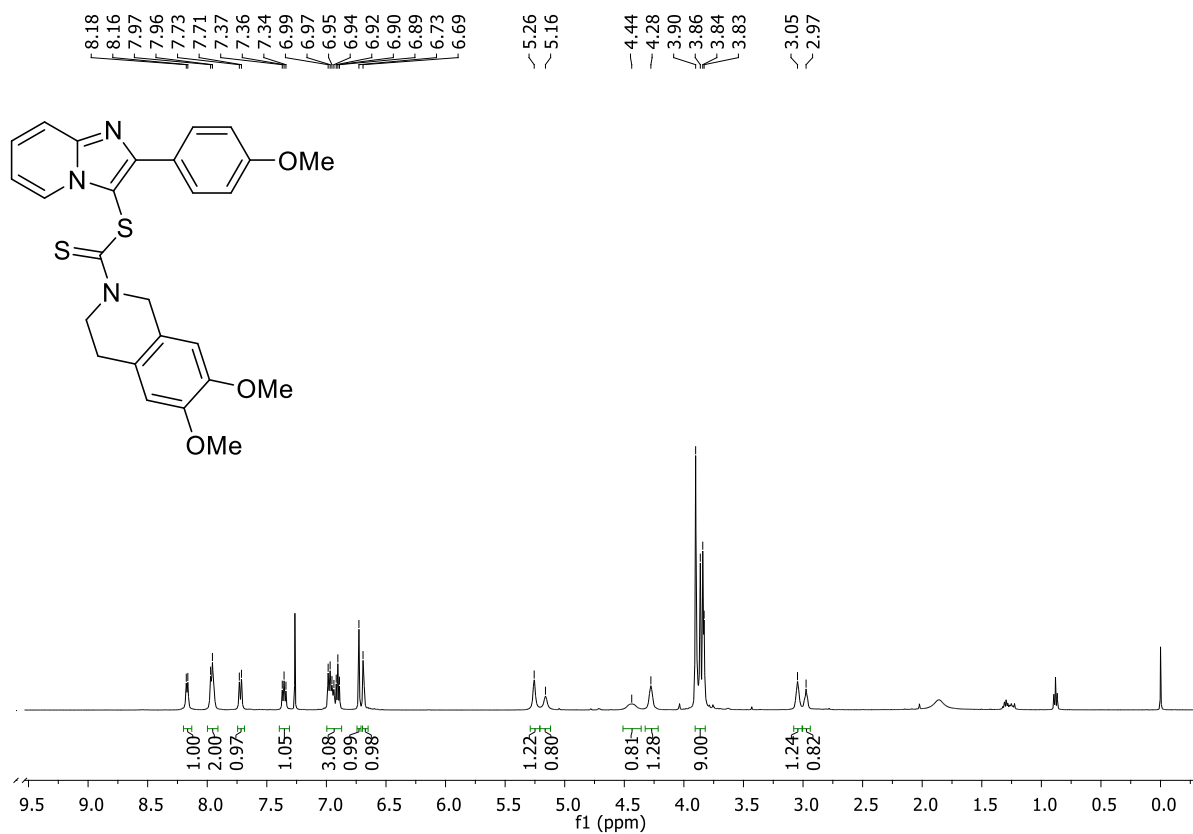

<sup>1</sup>H NMR (500 MHz, DMSO-*d*<sub>6</sub>) spectrum of compound **3bi**

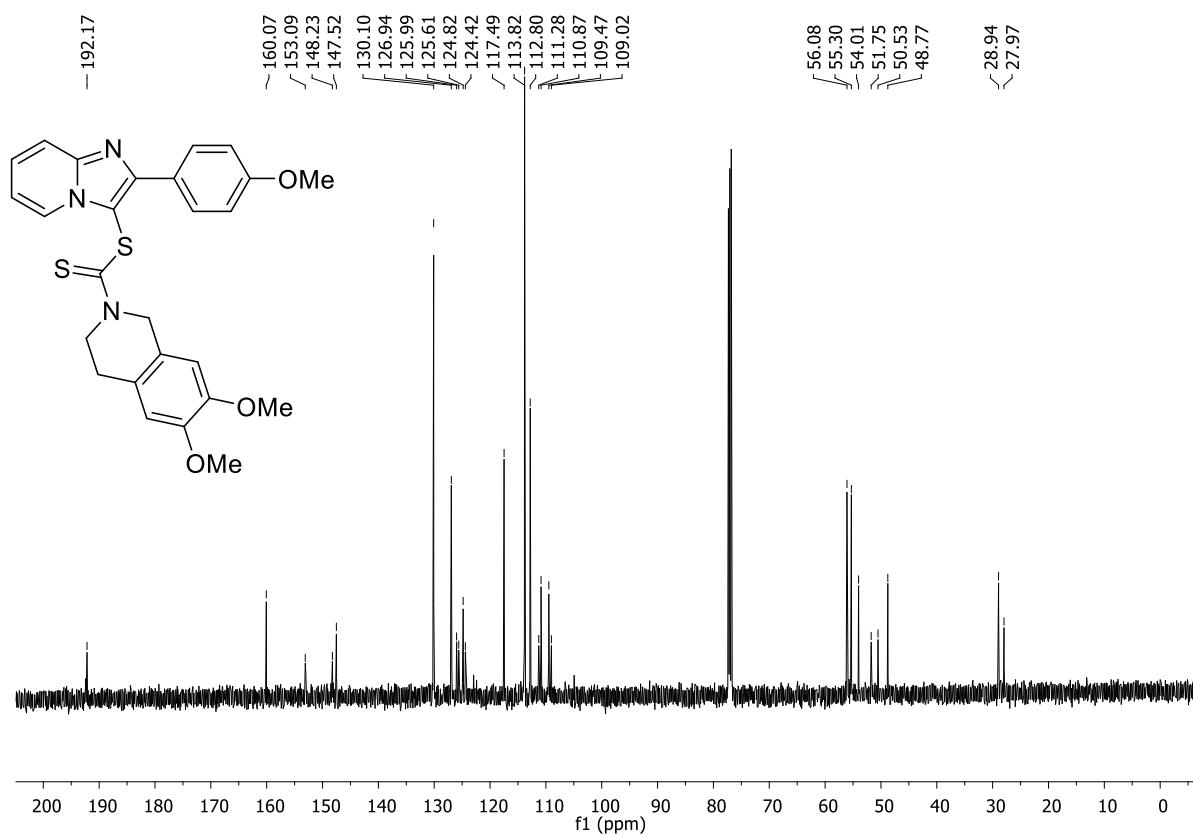

<sup>13</sup>C NMR (125 MHz, DMSO-*d*<sub>6</sub>) spectrum of compound **3bi**

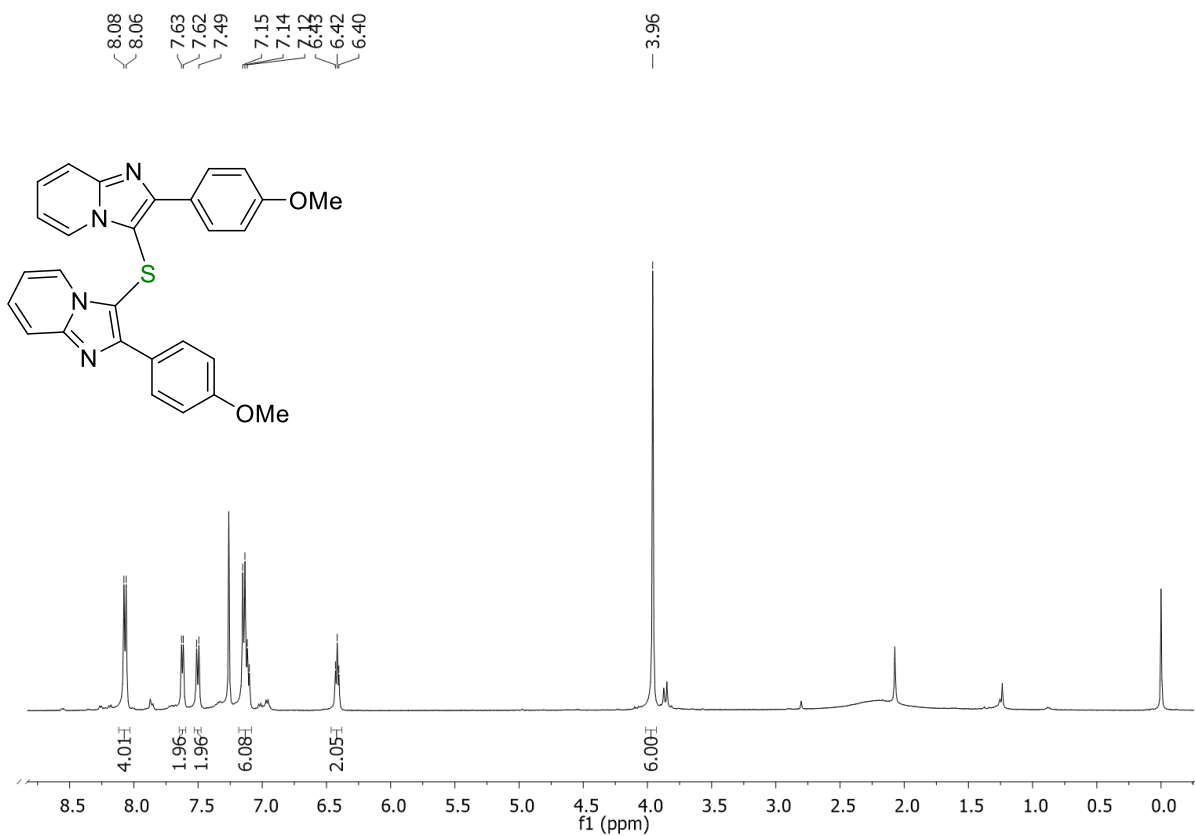

$^1\text{H}$  NMR (500 MHz,  $\text{DMSO}-d_6$ ) spectrum of compound **3bj'**

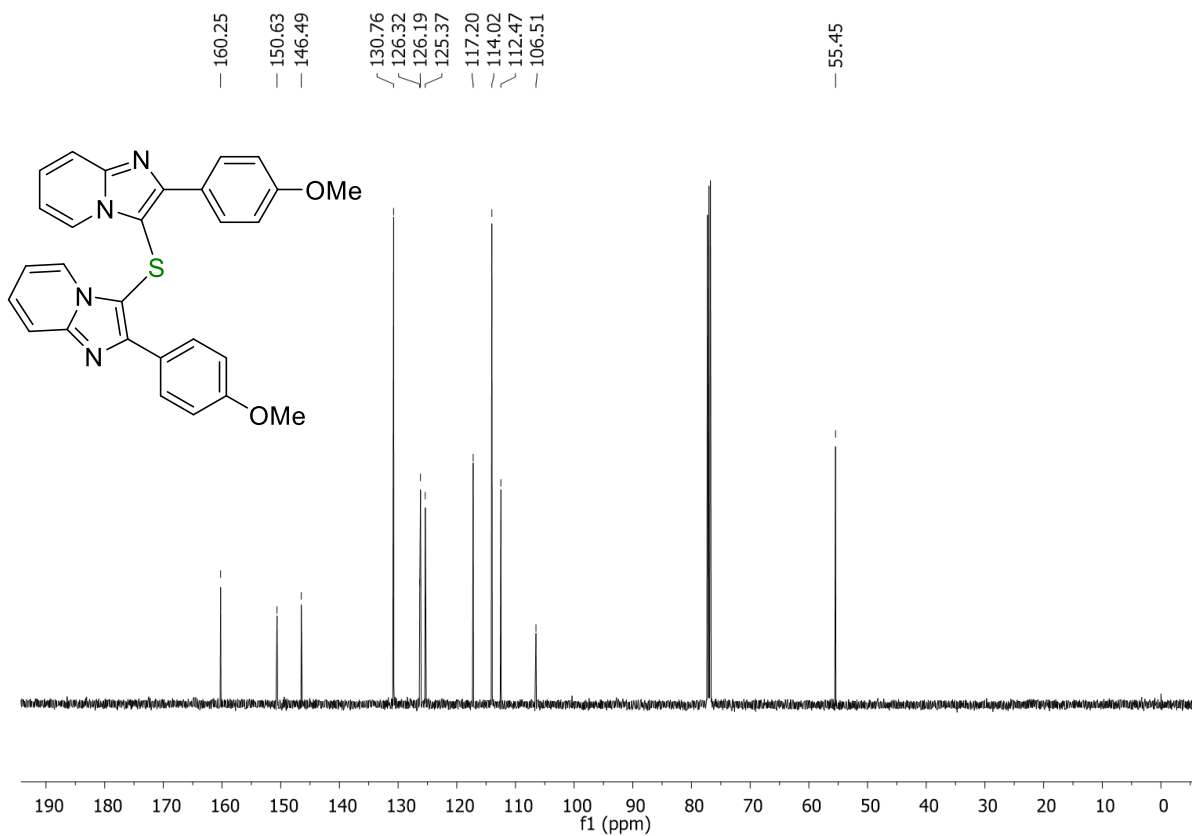

$^{13}\text{C}$  NMR (125 MHz,  $\text{DMSO}-d_6$ ) spectrum of compound **3bj'**

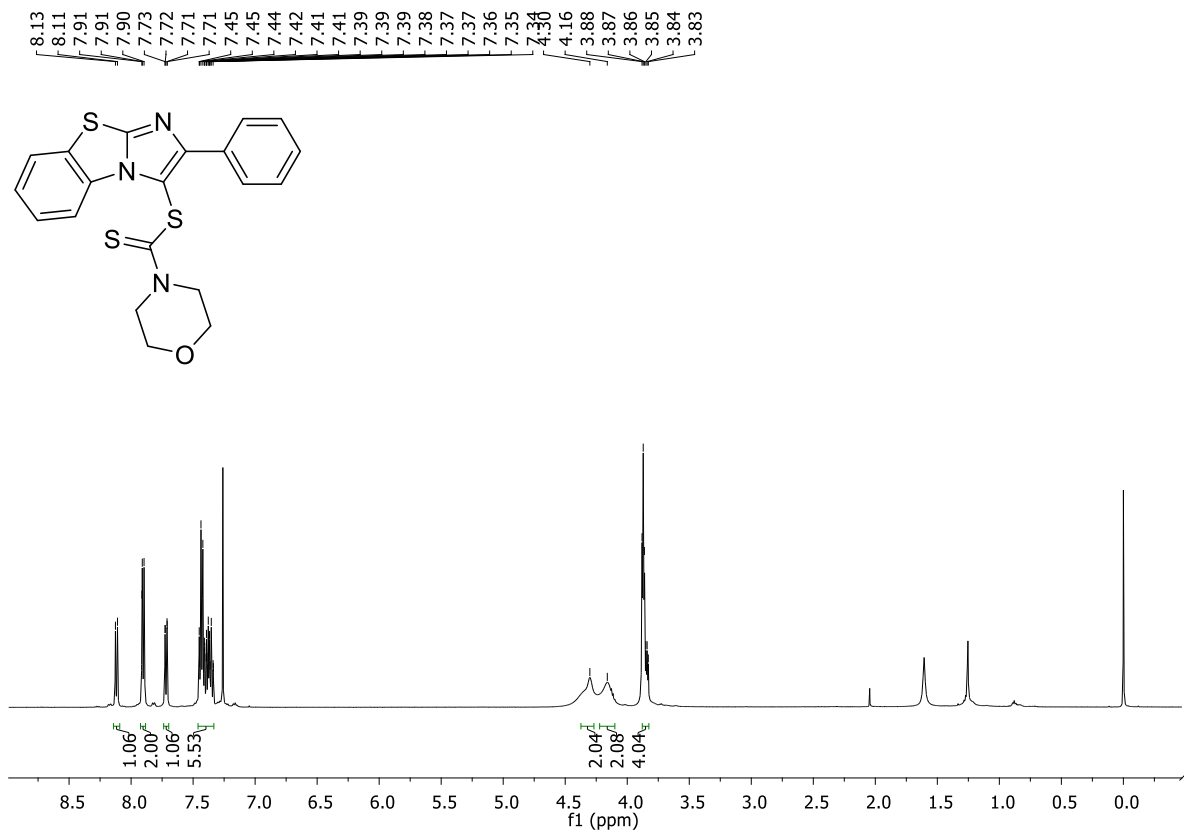

<sup>1</sup>H NMR (500 MHz, DMSO-*d*<sub>6</sub>) spectrum of compound **5a**

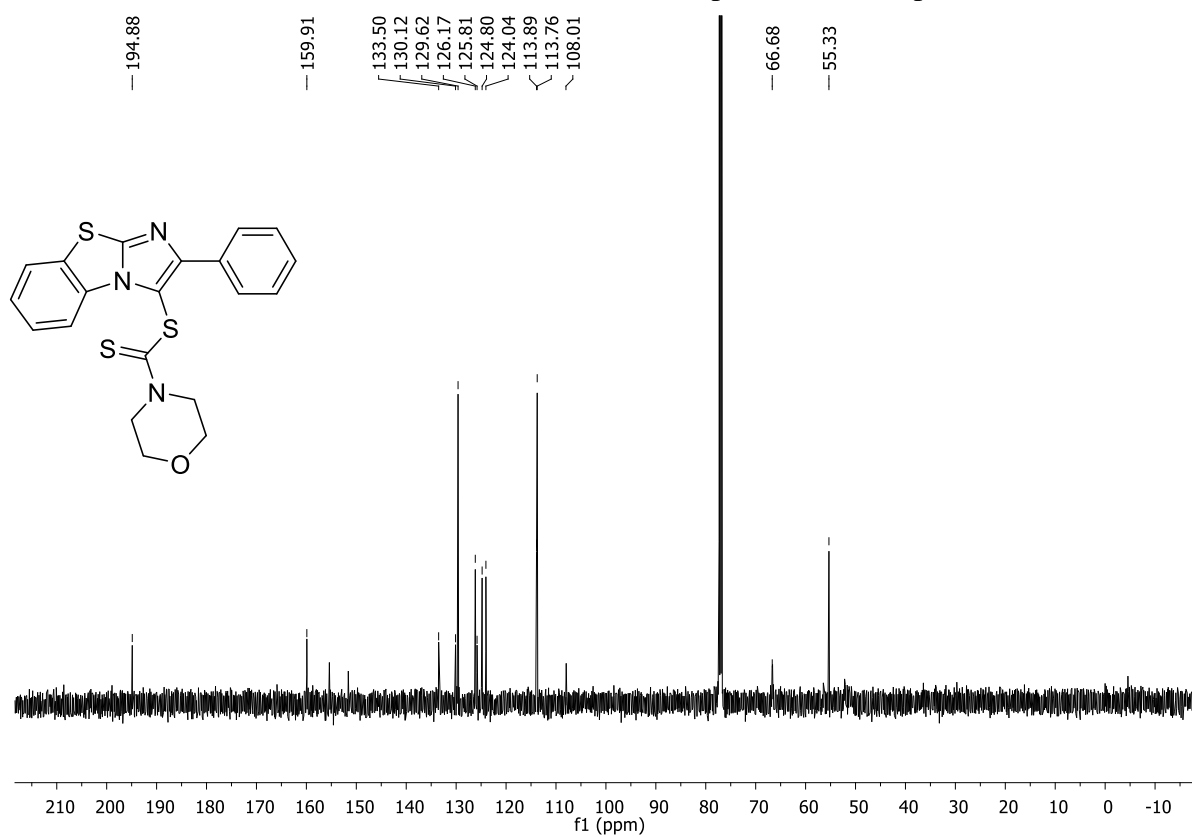

<sup>13</sup>C NMR (125 MHz, DMSO-*d*<sub>6</sub>) spectrum of compound **5a**

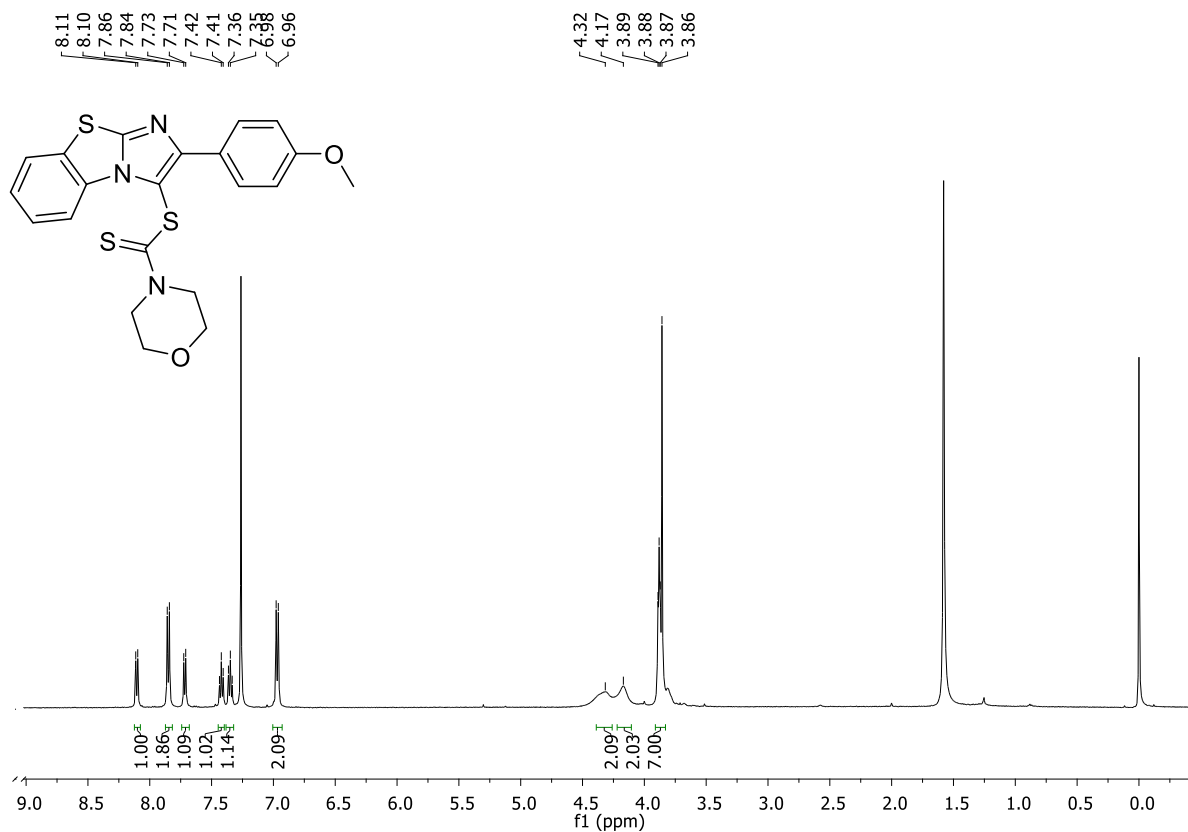

<sup>1</sup>H NMR (500 MHz, DMSO-*d*<sub>6</sub>) spectrum of compound **5b**

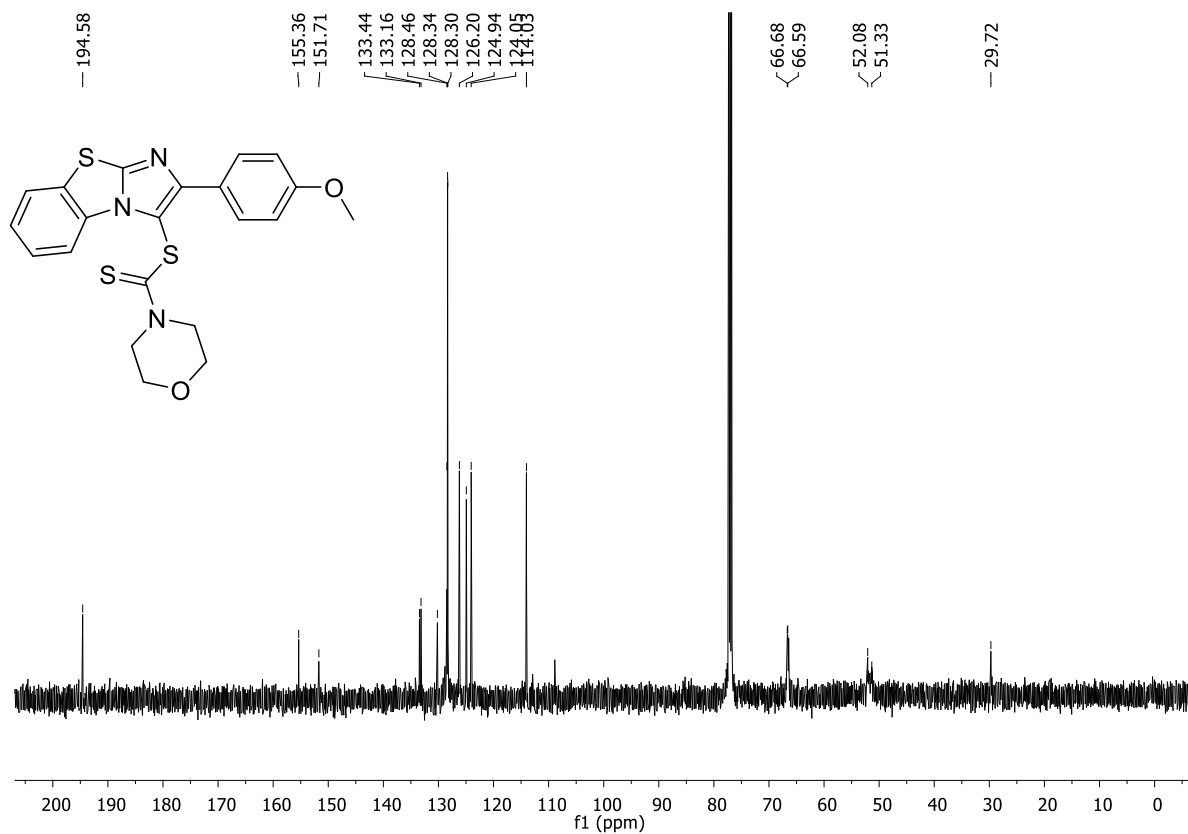

<sup>13</sup>C NMR (125 MHz, DMSO-*d*<sub>6</sub>) spectrum of compound **5b**



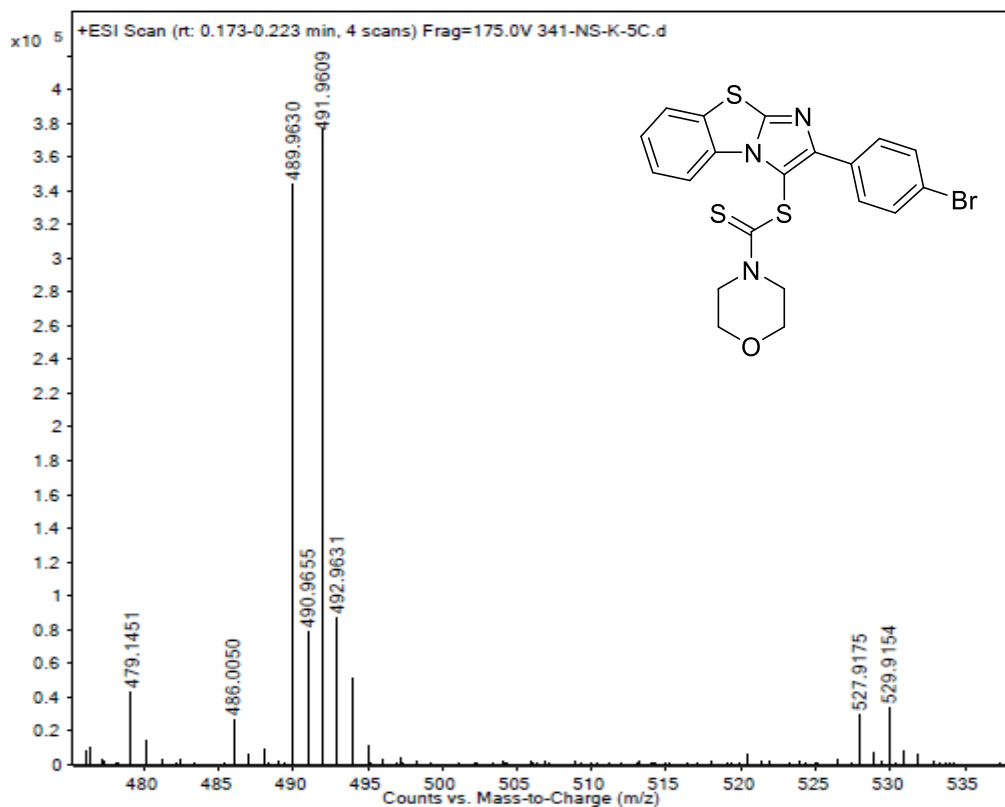

HR-MS of compound 5c

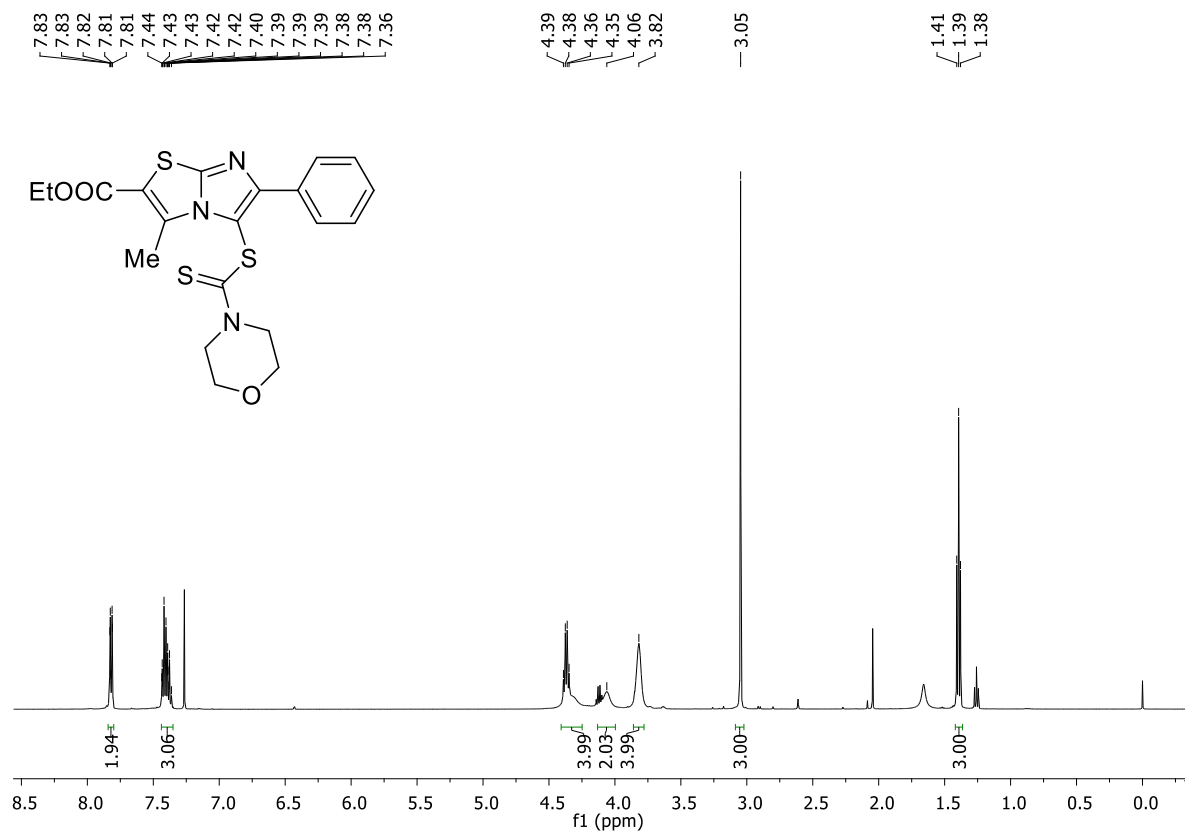

<sup>1</sup>H NMR (500 MHz, DMSO-*d*<sub>6</sub>) spectrum of compound 5d

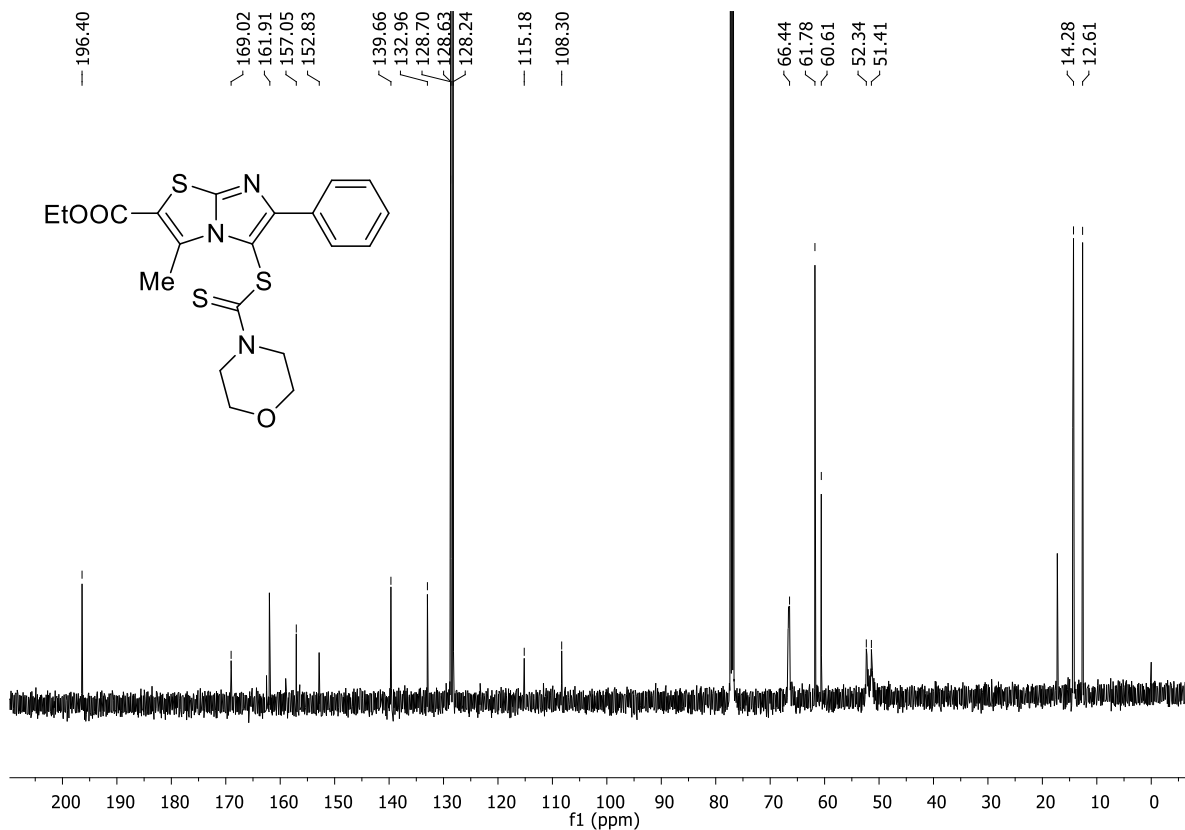

<sup>13</sup>C NMR (125 MHz, DMSO-*d*<sub>6</sub>) spectrum of compound **5d**

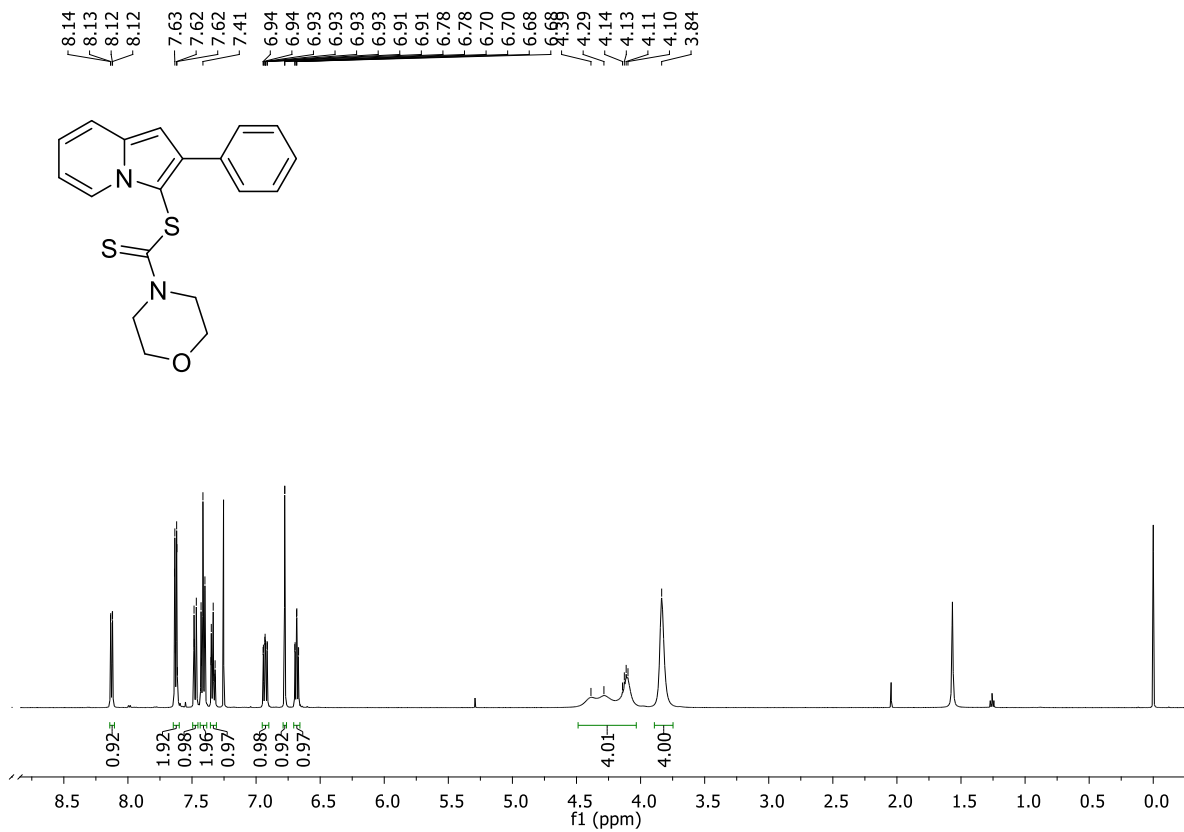

<sup>1</sup>H NMR (500 MHz, DMSO-*d*<sub>6</sub>) spectrum of compound **5e**

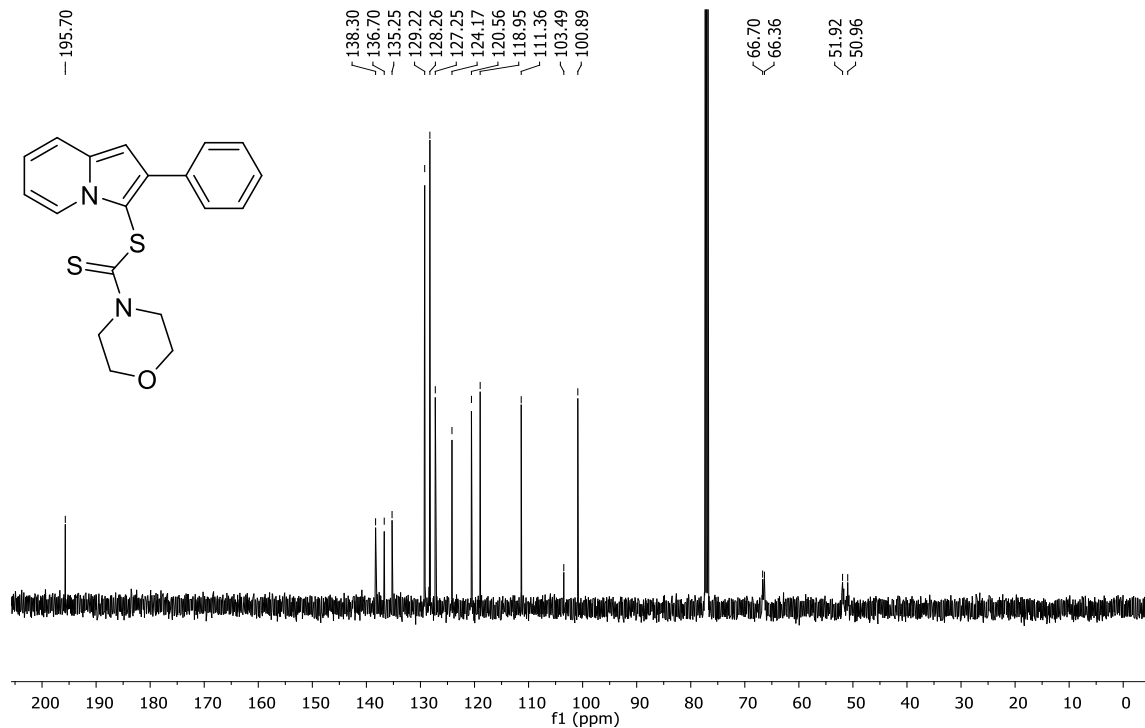

<sup>13</sup>C NMR (125 MHz, DMSO-*d*<sub>6</sub>) spectrum of compound 5e

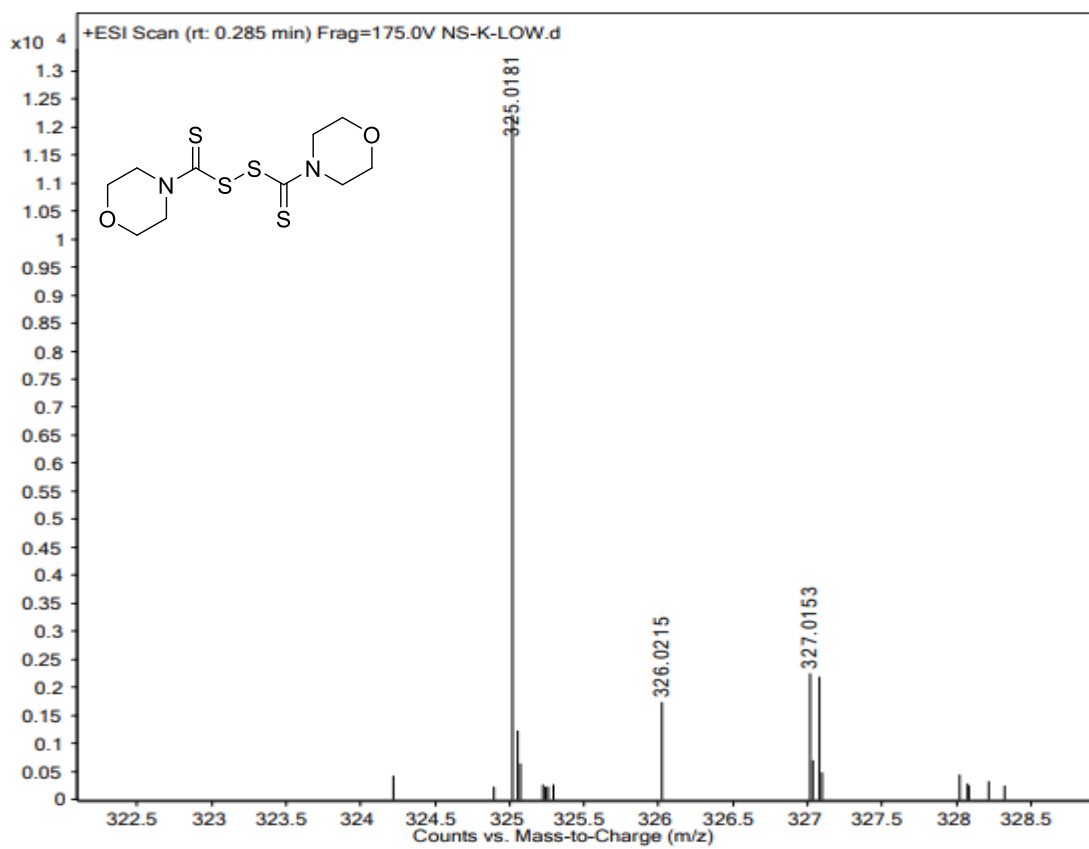

HR-MS of compound 6

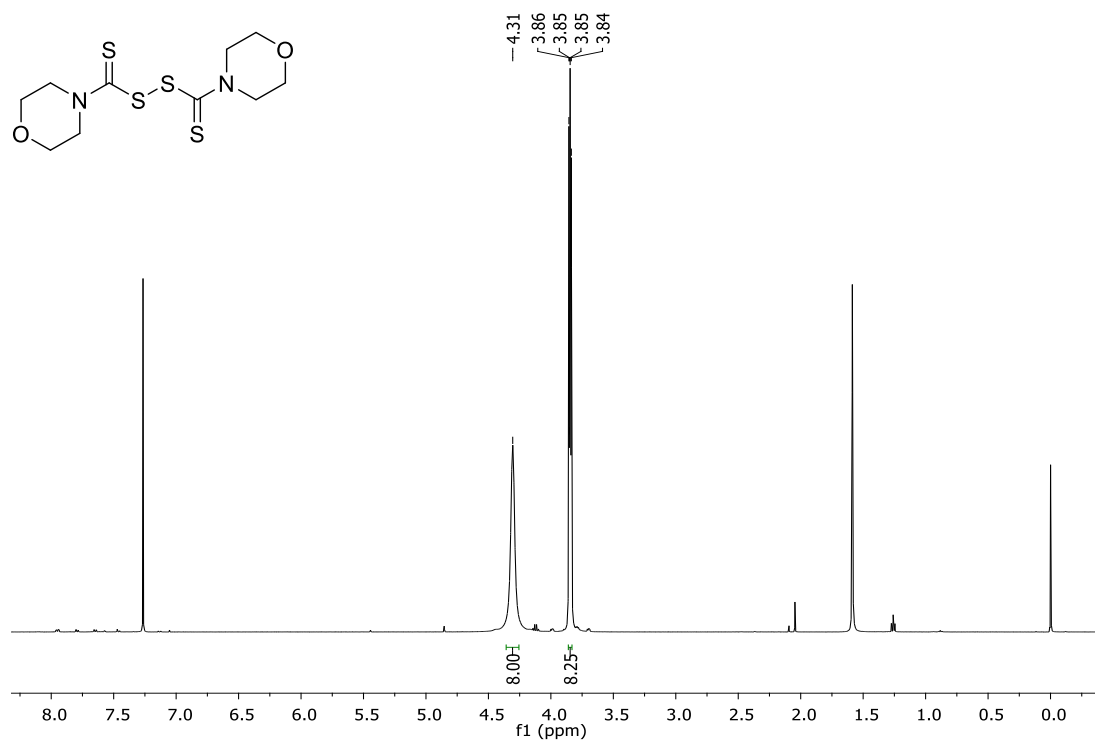

$^1\text{H}$  NMR (500 MHz,  $\text{DMSO}-d_6$ ) spectrum of compound 6

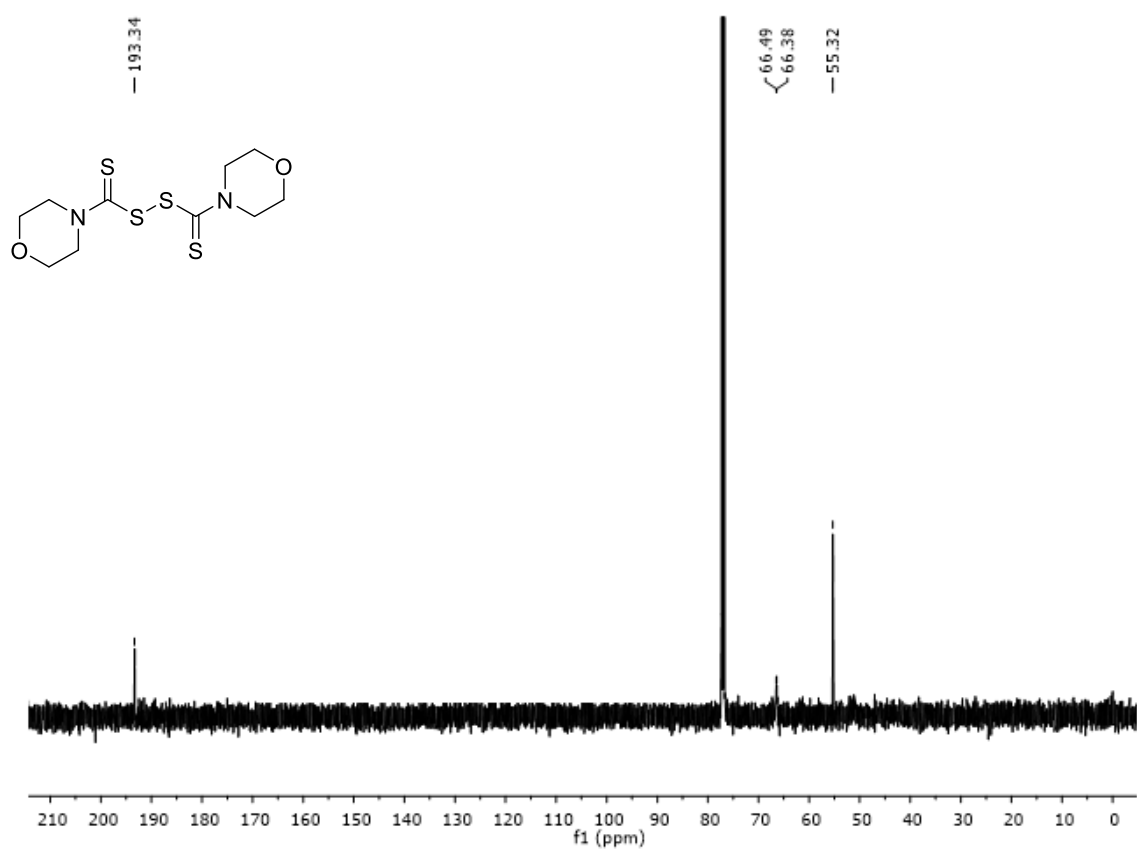

$^{13}\text{C}$  NMR (125 MHz,  $\text{DMSO}-d_6$ ) spectrum of compound 6

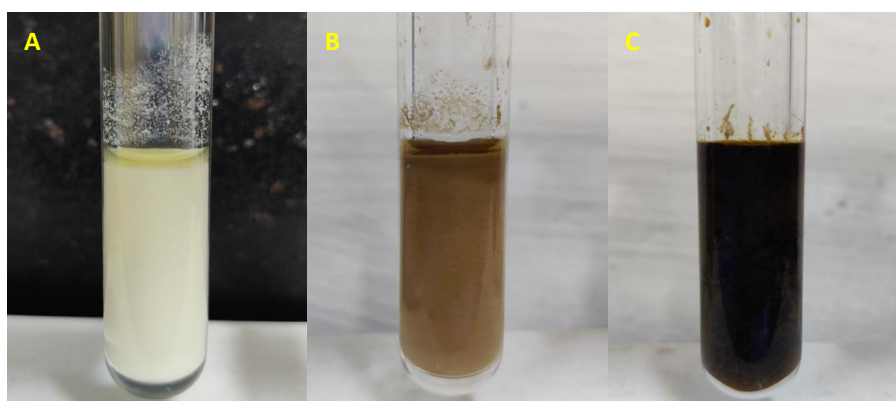

**Figure S1.** **A)** Imidazopyridines, secondary amine, and CS<sub>2</sub>; **B)** After addition of water-soluble copper(I) catalyst and O<sub>2</sub> purging; **C)** Reaction mixture after microwave-irradiation.

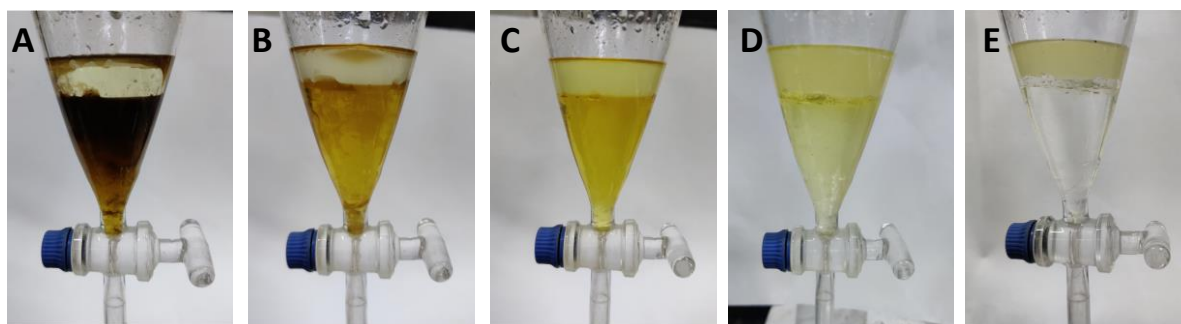

**Figure S2.** A-E suggests the change in the colour of organic layer of CH<sub>2</sub>Cl<sub>2</sub> (below) and aqueous layer (above) due to decreased catalyst loading during recyclability of catalyst in each cycle.

**Table S1.** Percentage inhibition of compounds **3aa–3na**, **3bb–3bi** and **5a–5e**<sup>[a]</sup>

| Compound   | Percentage Inhibition % (50 μM) |                      |
|------------|---------------------------------|----------------------|
|            | HCT-116 <sup>[b]</sup>          | MCF-7 <sup>[c]</sup> |
| <b>3aa</b> | <50                             | <50                  |
| <b>3ba</b> | <50                             | <50                  |
| <b>3ca</b> | <50                             | <50                  |
| <b>3da</b> | <50                             | <50                  |
| <b>3ea</b> | <50                             | 65.84                |
| <b>3fa</b> | <50                             | <50                  |
| <b>3ga</b> | <50                             | <50                  |
| <b>3ha</b> | <50                             | <50                  |
| <b>3ia</b> | <50                             | >50                  |
| <b>3ja</b> | <50                             | <50                  |
| <b>3ka</b> | <50                             | <50                  |
| <b>3la</b> | <50                             | <50                  |
| <b>3ma</b> | <50                             | >50                  |
| <b>3na</b> | <50                             | 57.17                |
| <b>3bb</b> | <50                             | <b>90.17</b>         |
| <b>3bc</b> | <50                             | 83.40                |
| <b>3bd</b> | <50                             | <50                  |

|                           |       |              |
|---------------------------|-------|--------------|
| <b>3be</b>                | 52.67 | <b>91.10</b> |
| <b>3bf</b>                | <50   | 55.78        |
| <b>3bg</b>                | <50   | <50          |
| <b>3bh</b>                | <50   | 80.42        |
| <b>3bi</b>                | <50   | <50          |
| <b>5a</b>                 | <50   | 50.42        |
| <b>5b</b>                 | <50   | <50          |
| <b>5d</b>                 | <50   | <50          |
| <b>5e</b>                 | <50   | <50          |
| <b>5-FU<sup>[d]</sup></b> | 75.82 | 70.35        |

<sup>[a]</sup>Percentage inhibition on HCT-116 and MCF-7 cancer cell lines at 50  $\mu\text{M}$  concentration after 48 h. <sup>[b]</sup> Human colon cancer cell line. <sup>[c]</sup> Human breast cancer cell line. <sup>[d]</sup> Standard drug 5-fluorouracil.

**Table S2.** Cytotoxic activity ( $\text{IC}_{50}$  in  $\mu\text{M}$ )<sup>[a]</sup> of most active analogues.

| <b>Compound</b>               | <b><math>\text{IC}_{50}</math> value (<math>\mu\text{M}</math>)</b> |                            |                              |
|-------------------------------|---------------------------------------------------------------------|----------------------------|------------------------------|
|                               | <b>HCT-116<sup>[b]</sup></b>                                        | <b>MCF-7<sup>[c]</sup></b> | <b>BEAS-2B<sup>[d]</sup></b> |
| <b>3bb</b>                    | –                                                                   | 10.20 $\pm$ 2.10           | >50                          |
| <b>3be</b>                    | –                                                                   | 7.28 $\pm$ 2.31            | >50                          |
| <b>Standard<sup>[e]</sup></b> | 16.58 $\pm$ 2.23                                                    | 24.78 $\pm$ 0.08           | –                            |

<sup>[a]</sup> 50% inhibitory concentration after 48 h of compound treatment. <sup>[b]</sup> Human colon cancer cell line. <sup>[c]</sup> Human breast cancer cell line. <sup>[d]</sup> Normal human lung epithelial cells. <sup>[e]</sup> 5-Fluorouracil (5-FU).
